1                   **High-throughput identification of RNA nuclear enrichment sequences**

2

3   Chinmay J Shukla<sup>1,2,3,4</sup>, Alexandra L McCorkindale<sup>1,7</sup>, Chiara Gerhardinger<sup>1,2</sup>, Keegan D  
4   Korthauer<sup>3,5</sup>, Moran N Cabili<sup>2</sup>, David M Shechner<sup>1,2</sup>, Rafael A Irizarry<sup>3,5</sup>, Philipp G Maass<sup>1\*</sup>, John  
5   L Rinn<sup>1,2,6\*</sup>

6

7   1. Department of Stem Cell and Regenerative Biology, Harvard University, Cambridge,  
8   Massachusetts 02138, USA

9   2. Broad Institute of MIT and Harvard, Cambridge, Massachusetts 02139, USA

10   3. Department of Biostatistics and Computational Biology, Dana-Farber Cancer Institute,  
11   Cambridge, Massachusetts 02115, USA

12   4. Program in Biological and Biomedical Sciences, Harvard Medical School, Boston,  
13   Massachusetts 02115, USA

14   5. Department of Biostatistics, Harvard T.H. Chan School of Public Health, Boston,  
15   Massachusetts 02115, USA

16   6. Department of Pathology, Beth Israel Deaconess Medical Center, Boston, Massachusetts  
17   02215, USA

18   7. Berlin Institute for Medical Systems Biology, Max Delbrück Center for Molecular Medicine,  
19   Berlin-Buch 13125, Germany

20

21   \* - These authors contributed equally

22   Author contact information: J.L.R. - [johnrinn@fas.harvard.edu](mailto:johnrinn@fas.harvard.edu)

23

24

25

## 26 **Summary**

27

28 One of the biggest surprises since the sequencing of the human genome has been the discovery  
29 of thousands of long noncoding RNAs (lncRNAs)<sup>1-6</sup>. Although lncRNAs and mRNAs are similar  
30 in many ways, they differ with lncRNAs being more nuclear-enriched and in several cases  
31 exclusively nuclear<sup>7,8</sup>. Yet, the RNA-based sequences that determine nuclear localization remain  
32 poorly understood<sup>9-11</sup>. Towards the goal of systematically dissecting the lncRNA sequences that  
33 impart nuclear localization, we developed a massively parallel reporter assay (MPRA). Unlike  
34 previous MPRA<sup>12-15</sup> that determine motifs important for transcriptional regulation, we have  
35 modified this approach to identify sequences sufficient for RNA nuclear enrichment for 38 human  
36 lncRNAs. Using this approach, we identified 109 unique, conserved nuclear enrichment regions,  
37 originating from 29 distinct lncRNAs. We also discovered two shorter motifs within our nuclear  
38 enrichment regions. We further validated the sufficiency of several regions to impart nuclear  
39 localization by single molecule RNA fluorescence *in situ* hybridization (smRNA-FISH). Taken  
40 together, these results provide a first systematic insight into the sequence elements responsible  
41 for the nuclear enrichment of lncRNA molecules.

42

## 43 **Main**

44

45 RNA subcellular localization provides a fundamental mechanism through which cells modulate  
46 and utilize the functions encoded in their transcriptomes<sup>16</sup>. This spatial layer of gene regulation is  
47 known to be critical in a variety of contexts, including asymmetric cell divisions<sup>17</sup>, embryonic  
48 development<sup>18-20</sup>, and signal transduction<sup>21</sup>. Previous work has identified a small number of *cis*-  
49 acting mRNA localization elements, using genetic approaches or hybrid reporter constructs to  
50 decipher sequences required for localization to different parts of the cell<sup>16,18</sup>. These elements are

51 often located in 3' untranslated regions (UTRs), and range from five to several hundred  
52 nucleotides in length<sup>9-11,18</sup>. Yet, the sequences and structures responsible for RNA localization  
53 remain inchoate. In contrast to mRNAs that are mostly localized outside the nucleus, lncRNAs  
54 are enriched or retained in the nucleus. Increasing evidence suggests that many lncRNAs may  
55 reside in the nucleus for the purpose of regulating nuclear processes, including formation of  
56 paraspeckles, topological organization of the nucleus, and regulation of gene expression<sup>1,3,4,22</sup>.  
57 However, while it is now evident that lncRNAs have important functions in the nucleus<sup>22</sup>, very little  
58 is known about specific sequence elements driving their nuclear enrichment<sup>9-11</sup>.

59  
60 To elucidate which sequences drive lncRNA nuclear enrichment, we developed a high-throughput  
61 approach for identifying nuclear enrichment elements. Our approach, derived from a massively  
62 parallel reporter assay (MPRA)<sup>12-15,23</sup>, is based on a previous assay demonstrating that the native  
63 cytosolic localization of a noncoding RNA reporter (a frame-shifted *Sox2* mutant, "fsSox2") can  
64 be altered by appending this reporter with additional RNA sequences<sup>9</sup>. The MPRA we designed  
65 highly parallelizes this assay by appending thousands of oligos to fsSox2. Briefly, we selected 38  
66 lncRNAs with diverse subcellular localization patterns: from single nuclear foci (e.g. *XIST*, *ANRIL*,  
67 *ANCR*, *PVT1*, *KCNQ1OT1*, *FIRRE*) to broadly diffuse cytosolic patterns (e.g. NR\_024412,  
68 XLOC\_012599)<sup>24</sup>. We generated a pool of 11,969 oligos 153 nucleotides in length, each with a  
69 unique barcode, that tiles each of the 38 lncRNAs. This pool was expressed in HeLa cells followed  
70 by nuclear isolation and targeted deep sequencing to determine the partitioning of each fsSox2  
71 variant (**Figure 1A, Extended Data Table 1, Methods**). All experiments were performed as six-  
72 biological replicates to ensure sufficient statistical power for our analytical model, and accurately  
73 estimate in-group variance (see below, *Methods*).

74

75 To identify lncRNA nuclear enriched regions we implemented a statistical method that merges  
76 individual nucleotides into longer aggregate regions<sup>25</sup>. We further ranked candidate regions using  
77 a newly defined summary statistic, that generates a null distribution for this statistics by permuting  
78 sample labels, and uses this null distribution to assigns  $p$ -values (**Extended Data Figure 1**;  
79 *Methods*). Our approach leverages the inter-replicate variability inherent in high throughput  
80 reporter assays and allows us to sensitively and accurately discover nuclear enriched RNA  
81 segments which we term “differential regions” (DRs). Importantly, our method allows us to identify  
82 DRs greater than individual oligos based on their coherence across larger regions.

83

84 To test the performance of our assay and analytic method we first focused on a well established  
85 nuclear lncRNA *MALAT1*. Previous work demonstrated that two elements termed Region E and  
86 Region M, derived from the lncRNA *MALAT1*, are particularly potent RNA nuclear localization  
87 signals<sup>11</sup>. We examined the nuclear enrichment of all fsSox2 pool variants bearing elements  
88 derived from lncRNA *MALAT1* (*Methods*). Consistent with the previous study, nucleotides derived  
89 from Region E and Region M were highly enriched in the nucleus compared to those residing  
90 elsewhere in the human *MALAT1* lncRNA. Thus, our assay can recapitulate known RNA  
91 localization signals and our analysis approach can identify localization domains longer than a  
92 given tiled oligos.

93

94 Next we sought to agnostically and systematically investigate nuclear enrichment regions  
95 harbored within 38 lncRNAs. Our analysis identified 109 DRs (FDR < 0.1) originating from 29  
96 distinct lncRNAs that were significantly enriched in nuclear fractions, relative to whole cell lysates  
97 (**Extended Data Table 2**). Two of these DRs overlap and subsume Region M while another DR  
98 overlaps with Region E within the *MALAT1* lncRNA (**Figure 1B, 1C**). To confirm that our approach  
99 was robust, we compared the significant DRs to all other regions represented in our pool and

100 found them significantly more nuclear enriched (**Figure 1D**;  $P < 1/10^6$ , Mann-Whitney Test;  
101 *Methods*). The localization patterns of the selected 38 lncRNAs have been previously parsed into  
102 five smRNA-FISH classes<sup>24</sup>. These included lncRNAs strictly nuclear (FISH Class I), those that  
103 are diffusely localized in the cytoplasm (FISH Class V), and three intermediate classes (FISH  
104 Classes II–IV). Our MPRA approach discovered DRs derived from lncRNAs in all five FISH  
105 classes (**Figure 2A–E**). Notably, the number of DRs within each class broadly correlated with the  
106 degree of nuclear localization observed by smRNA-FISH (**Figure 2F**). Many strictly-nuclear  
107 lncRNAs (FISH Class I) harbor multiple DRs, possibly indicating the presence of a redundant  
108 nuclear localization motif. For example, we discovered 18 DRs in *XIST* and 10 DRs in *MALAT1*  
109 and some of the DRs we discovered in *XIST* overlap with previously-described repeat elements  
110 – RepC and RepD.

111  
112 We further analyzed the evolutionary conservation, length distribution, and sequence content of  
113 these putative nuclear localization sequences. We used phastCons<sup>26,27</sup> scores to assess  
114 evolutionary conservation, and we observed significantly higher scores among our DRs than in  
115 other lncRNA regions tiled by our MPRA (**Figure 2G**;  $P < 1/10^6$ , Mann-Whitney Test; *Methods*).  
116 The lengths of our DRs ranged from 80–740 nucleotides (nt), with an average of 300 nt (**Extended**  
117 **Data Figure 6A**). While we detected a weak correlation between the length of a given lncRNA  
118 and number of DRs within (**Extended Data Figure 6B**), this analysis is confounded by  
119 inconsistent length of lncRNAs across the five FISH classes. Finally, we did not observe a  
120 difference in GC content between the DRs and other sequences in our tiled lncRNAs (**Extended**  
121 **Data Figure 6C**).

122  
123 We hypothesized that our DRs might harbor common sequence motifs or protein-binding  
124 preferences. To test this, we searched for motifs that were more prevalent among the DRs than

125 in other regions of the lncRNAs, using the MEME software package<sup>28</sup>. We identified a 57 nt motif  
126 occurring 18 times exclusively in *XIST*, and not elsewhere in the human genome (**Figure 3A–C**).  
127 Another, 15 nt “C-rich” motif was found in 52 DRs of 21 different lncRNAs (**Figure 3D–F**), and we  
128 discovered four additional motifs closely related to the described here (**Extended Data Figure**  
129 **7A–D**). Similarly, k-mer analysis<sup>29</sup> revealed several C-rich 4-mers that were mildly predictive of a  
130 DR (**Extended Data Figure 7E**). In total, we discovered six motifs and confirmed that the  
131 nucleotides overlapping these motifs were significantly enriched in the nucleus ( $P < 1/10^6$ , Mann-  
132 Whitney Test, *Methods*), compared to all other regions tiled in our MPRA (**Figure 3G**). Since the  
133 C-rich motif occurred in more than 50 distinct DRs of diverse lncRNAs, we postulated that this  
134 motif could function as a global RNA nuclear localization element. To test this, we examined the  
135 nuclear–cytoplasmic localizations of all human transcripts containing this motif, using fractionation  
136 RNA-Seq data from ENCODE<sup>30</sup>. We observed a modest increase ( $P < 1/10^6$ , Mann-Whitney Test)  
137 in nuclear localization of transcripts with the C-rich motifs across all 11 ENCODE TIER 2 cell lines  
138 (**Figure 3H, I, Extended Data Figure 8**). This further demonstrates the potential power of our  
139 MPRA to discover functional elements that may be missed by classic RNA localization studies. A  
140 similar C-rich motif was recently discovered by another group and has been investigated in  
141 mechanistic detail (Igor Ulitsky – personal communication).  
142  
143 We independently tested if these motifs are sufficient for nuclear localization using smRNA-FISH.  
144 Briefly, we appended the consensus motif sequences identified by our MPRA to the 3’ end of the  
145 cytosolic *fsSox2* reporter and electroporated these constructs in HeLa cells<sup>9</sup>. We then performed  
146 smRNA-FISH<sup>31</sup> and did a double blinded quantification of the signals in more than 300 nuclei for  
147 each electroporated construct using StarSearch<sup>31</sup> (*Methods*). We observed that ~30 % of *fsSox2*  
148 transcripts localized in the nucleus but appending the repetitive *XIST* motif (Motif 1) slightly  
149 increased nuclear localization to ~40% (**Figure 4**;  $P = 0.03$ , Mann-Whitney Test). Appending the

150 C-rich motif (Motif 2) did not significantly affect the localization of *fsSox2* (**Figure 4**). These results  
151 suggest that small motifs could exhibit a weak effect of RNA nuclear enrichment, but are  
152 insufficient for localization.

153  
154 Since we observed only a small effect for a short motif like the *XIST* motif to affect nuclear  
155 enrichment, we next asked next whether longer regions identified by our MPRA would show a  
156 stronger effect. To this end we generated multiple *fsSox2*:DR constructs (DRs: *MALAT1*, *TUG1*,  
157 *XIST*) and compared their subcellular localization to the native *fsSox2* transcript by smRNA-FISH.  
158 We found that *MALAT1* “Region M” significantly increased nuclear enrichment of *fsSox2* (**Figure**  
159 **4**;  $P < 1/10^6$ , Mann-Whitney Test). Similarly, a novel *TUG1* DR identified by our MPRA, as well  
160 as the *XIST* DR, which harbors the *XIST* motif, showed also nuclear enrichment of *fsSox2* (**Figure**  
161 **4**;  $P < 1/10^6$ , Mann-Whitney Test; *Methods*). Thus, the longer DRs identified in our MPRA are  
162 sufficient to significantly change the nuclear enrichment of a cytosolic transcript where as shorter  
163 motifs could not.

164  
165 Collectively, our study has several implications. First, we have demonstrated a new functional  
166 MPRA which can identify longer nuclear enrichment sequences by computationally stitching short  
167 (110 bp) oligonucleotides together. Second, we have discovered motifs common to many DRs  
168 that tend to be nuclear enriched. However, these small motifs exhibit only a mild propensity for  
169 nuclear enrichment when tested independently. Conversely, longer DRs were sufficient to change  
170 the nuclear enrichment of a cytosolic reporter. While this manuscript was in preparation, a C-rich  
171 motif similar to that identified by our MPRA was also found by other investigators and functionally  
172 tested by mutation and protein binding preferences (Igor Ulitsky – personal communication).  
173 Third, many DRs identified in our study did not harbor any motif and many lncRNAs harbored  
174 multiple DRs.

175

176 Taken together, these results indicate that there does not appear to be a small universal sequence  
177 motif that is sufficient for nuclear enrichment. Rather, we propose that multiple unique sequences  
178 co-occurring within a longer structured region are responsible for nuclear enrichment for each  
179 lncRNA. While additional studies will need to confirm this prediction, our study provides an  
180 important initial map and a systematic, unbiased framework to explore RNA nuclear enrichment  
181 signals.

182

## 183 **Methods**

### 184 **Oligo Pool Design**

185 We designed 153-mer oligonucleotides to contain, in order, the 16-nt universal primer site  
186 ACTGGCCGCTTCACTG, a 110-nt variable sequence, a 10-nt unique barcode sequence and the  
187 17-nt universal primer site AGATCGGAAGAGCGTCG. The unique barcodes were designed as  
188 described previously while the variable sequences were obtained by tiling lncRNA sequences.  
189 The resulting oligonucleotide libraries were synthesized by Broad Technology Labs.

190

### 191 **ePCR amplification of oligopool**

192 The synthesized oligopool was amplified by emulsion-PCR (ePCR, Micellula DNA Emulsion &  
193 Purification Kit, Chimerx), according to the manufacturers' instructions. The e-PCR primers were  
194 designed to add the Age I / Not I restriction sites to the synthesized oligos for subsequent cloning  
195 (Age I primer: AATAATACCGGTACTGGCCGCTTCACTG; Not I primer: GAGGCCGCG  
196 GCCGCCGACGCTCTTCCGATCT). To determine the oligos representation of the ePCR  
197 amplified oligo pool (based on the unique 3' barcode of each oligo), 1 ng of the amplified oligo  
198 pool was used as input for library preparation (see below) and sequenced on a MiSeq (SR,  
199 Illumina).



200

## 201 **Cloning**

202 A minCMV promoter (5'-TAGGCGTGTACGGTGGGAGGCCTATATAAGCAGAGCTCGTTTAGT  
203 GAACCGTCAGATCGC-3') was cloned upstream of fsSox2<sup>9</sup>. The ePCR-amplified oligopool and  
204 the identified motifs and candidate regions were digested with Age I / Not I and inserted 3' of  
205 fsSox2. For MPRA-cloning, the ligation reaction (100 ng backbone + 4 x molar excess of  
206 oligopool) was transformed into 10 x DH5 $\alpha$  tubes (ThermoScientific). A total of 20 ampicillin LB  
207 plates were inoculated with the 10 transformation reactions and incubated overnight at 37°C. All  
208 bacterial colonies were then scraped in 5 ml of LB per plate and pooled, and the plasmids were  
209 purified with the endotoxin-free Qiagen Plasmid Plus Maxi kit (Qiagen). The cloned oligopool was  
210 then sequenced on the MiSeq to determine the oligo representation as described above.

211

## 212 **Cell fractionation**

213 HeLa nuclear and cytoplasmic fractions were isolated as previously described<sup>9</sup>. The success of  
214 the fractionations (**Extended Data Figure 2B**) was confirmed by qRT-PCR of the nuclear ncRNA  
215 NEAT1 and the cytoplasmic ncRNA SNHG5 in RNA isolated (see below) from whole cells, the  
216 pelleted nuclei, and from the cytoplasmic fractions.

217

## 218 **RNA extraction and qRT-PCR**

219 RNA was isolated by TRIzol (ThermoScientific) - chloroform extraction, followed by isopropanol  
220 precipitation, according to standard procedures. 2  $\mu$ g of BioAnalyzer-validated RNA were  
221 digested with recombinant DNase-I (2.77 U/ $\mu$ l, Worthington #LS006353) at 37°C for 30 min,  
222 followed by heat-inactivation at 75°C for 10 min. Reverse transcription was performed with  
223 SuperScript III cDNA synthesis kit (ThermoScientific). Quantitative RT-PCR was performed using  
224 the FastStart Universal SYBR Green Master mix (Roche) on an ABI 7900. Primers were: NEAT1

225 forward TGATGCCACAACGCAGATTG, reverse GCAAACAGGTGGGTAGGTGA, and SNHG5  
226 forward GTGGACGAGTAGCCAGTGAA, reverse GCCTCTATCAATGGGCAGACA. After  
227 processing the raw data by qPCR Miner<sup>32</sup>, the efficiency of each primer set was used to calculate  
228 the relative initial concentration of each gene. The relative expression in the nuclear and  
229 cytoplasmic fractions was then calculated by normalization to that in the whole cell.

230

### 231 **Library preparation**

232 Sequencing libraries were prepared by PCR amplification using PfuUltra II Fusion DNA  
233 polymerase (Agilent #600672) and primers designed to anneal to the universal primer site flanking  
234 the oligos and to add sequencing index barcode for multiplexing: forward  
235 caagcagaagacggcatacagatCGTGATgtgactggagttcagacgtgtgctcttccgatctACTGGCCGCTTCACT  
236 G, reverse AATGATACGGCGACCAACGAGATCTACTCTTTCCCTACACGACGCTCTTCCG  
237 ATCT (capital letters indicate (1) the index for the library and (2) the region complementary to the  
238 universal primer site). PCR amplification (initial denaturation 95°C – 2 min; cycling 95°C – 30  
239 secs, 55°C – 30 secs, 72°C – 30 sec; final extension 72°C – 10 min) was carried out for 30 cycles  
240 followed by triple 0.6x, 1.6x, and 1x SPRI beads (Agencourt AMPure XP, Beckman Coulter)  
241 cleanup. The quality and molarity of the libraries was evaluated by BioAnalyzer and the samples  
242 were sequenced in a pool of 6 on the Illumina HiSeq2500, full flow cell, single-read 100 bp. To  
243 ensure the transfection was successful, we required that at least 70% of the oligo pool was  
244 represented back (i.e. had a count of at least one) in the sequencing sample. (**Extended Data**

245 **Figure 2, 3 and 4**)

246

### 247 **Analyzing MPRA Data**

248 *Read Mapping and Obtaining Counts Table*

249 To find a unique mapping location for the read, we ensured an exact match between the first 10  
250 read nucleotides and a unique oligo barcode. To ensure that the correct oligo was identified using  
251 this barcode match, we allowed only 2 mismatches between the remaining 65 nts of the read  
252 sequence and the upstream oligo sequence corresponding to the unique barcode (**Extended**  
253 **Data Figure 1A**). The resulting counts for each oligo in every sample (6 Nuclei and 6 Total) were  
254 compiled in a counts table (**Extended Data Figure 1A**).

255

#### 256 *Normalizing the counts table*

257 The counts table was normalized using a library size correction in order to facilitate comparing  
258 counts across samples with different sequencing depths. The library size was calculated as the  
259 total number of reads in each sample.

260

#### 261 *Modeling Nucleotide Counts from Oligo Counts*

262 The counts of a particular nucleotide were modeled by taking the median of counts for every oligo  
263 tiling the nucleotide (**Extended Data Figure 1B**). We tried other methods to model nucleotide  
264 such as taking the sum of the counts of all oligos tiling the given nucleotide and a probabilistic  
265 graphical model as used recently<sup>15</sup> but the simple and intuitive median approach yielded  
266 comparable results. Since the offset between subsequent oligos was usually 10 nucleotides, we  
267 obtained nucleotide counts also at a 10 nucleotide resolution. The resulting modeled nucleotide  
268 counts table (**Extended Data Table 2**) was used to infer differential regions.

269

#### 270 *Inferring Differential Regions from Modeled Nucleotide Counts*

271 There are 2 main steps in inferring differential regions from modeled nucleotide counts – (i).  
272 Identifying potential candidate regions and (ii). Assigning a p-value for each potential candidate  
273 region (**Extended Data Figure 1C**). We identified potential candidate regions by calculating the

274 median of the difference between nuclear counts and total counts across all 6 replicates at each  
275 nucleotide and then grouping together neighboring points that exceeded a threshold, as described  
276 previously<sup>25</sup>. We then defined a summary statistics for each region based on the differences  
277 between nuclear and total counts of each nucleotide in the region as well as the trend of these  
278 counts. To assess the uncertainty of this procedure we generated a list of global null candidates  
279 by shuffling the sample labels and computed a summary statistic for these regions to form a null  
280 distribution. Then we ranked each potential candidate region by comparing their respective  
281 summary statistic to the null distribution to obtain an empirical p-value. The p-values were  
282 converted to q-values using the Benjamini-Hochberg approach.

283

## 284 **Motif Analysis**

285 MEME software package was used to find motifs enriched in differential regions. Specifically, we  
286 used the MEME function in the suite in the discriminative mode with DR sequences as the list of  
287 primary sequences and the other sequences in the pool as the controls. We ran MEME in different  
288 settings – OOPS and ANR - to ensure we found motifs that were repeating several times in a  
289 given DR and those only occurring once.

290

## 291 **K-mer Enrichment**

292 If sequence preferences are driven by more general sequence composition preferences that  
293 cannot be so easily represented by regular expression or position weight matrix motif models,  
294 then nuclear enrichment of DRs may be more effectively modeled by considering all k-mers. To  
295 this end, we performed a regression to assign weight coefficients to all k-mers for the DR  
296 sequences and non-DR sequences similar to the motif analysis using MEME as described  
297 previously. To avoid overfitting, we performed ridge regression<sup>29</sup>, which minimizes not only the  
298 distance between model predictions and actual values but also the magnitude of the weights. We

299 chose the alpha parameter that varies the emphasis of these two competing objectives by  
300 evaluating fivefold cross-validated mean squared error over a parameter grid.

301

### 302 **Conservation Analysis**

303 The phastCons and phyloP scores for the whole genome were downloaded from UCSC genome  
304 browser. We extracted these scores for the DRs and shuffled control regions using a custom  
305 script. In order to account for natural conservation differences between lncRNAs and mRNAs as  
306 well as among different lncRNAs, the control regions were obtained by shuffling the DR  
307 sequences using shuffleBed but ensuring the new regions fell within exons of the lncRNAs the  
308 DRs were from. Finally, the scores were compared between DR and non-DR regions using the  
309 Mann-Whitney test.

310

### 311 **ENCODE Fractionation RNA-Seq**

312 We downloaded the raw RNA-Seq reads for the nucleus and cytosolic compartments from the  
313 ENCODE<sup>30</sup> website. These reads were quantified using kallisto to obtain TPMs and then the  
314 nuclear/cytosolic TPMs of transcripts with the motif (found using the FIMO software) were  
315 compared to all the other transcripts.

316

### 317 **Single molecule RNA fluorescence *in situ* hybridization (smRNA FISH)**

318 Briefly, 70-80% confluent  $1 \times 10^6$  HeLa [ATCC® CCL-2™] cells were electroporated with 2  $\mu$ g of  
319 construct using the Amaxa® Cell Line Nucleofector® Kit R using program I-013, and cultured for  
320 48 hours in LabTek v1 glass chambers. smRNA-FISH was performed using Biosearch  
321 Technologies Stellaris® probes, as described previously (Reference). RNA probes targeting and  
322 tiling the fsSox2 exon were conjugated to Quasar 570. Nuclei were visualized with 4,6-diamidino-  
323 2-phenylindole (DAPI). Images were obtained using the Zeiss Cell Observer Live Cell microscope

324 at the Harvard Center for Biological Imaging. For each field of view, at least 40 slices (each plane:  
325 0.24  $\mu\text{m}$ ) were imaged, and z-stacks were merged with maximum intensity projections (MIP).  
326 Sox2 foci were computationally-identified using the spot counting software StarSearch. To ensure  
327 robustness, the analysis was blinded and the person counting the spots did not know the identity  
328 of the samples. For each construct, fsSox2 foci within at least 150 cells were counted in biological  
329 duplicate.

330

### 331 **Code availability**

332 All the analysis in this paper was carried out using a custom package developed for the  
333 experiment called oligoGames. The package is currently hosted on GitHub -  
334 <https://github.com/cshukla/oligoGames>.

335

### 336 **Data availability**

337 All analyzed sequence data has been deposited in NCBI GEO under accession GSE98828.

338

### 339 **References**

- 340 1. Brown, C. J. *et al.* The human XIST gene: analysis of a 17 kb inactive X-specific RNA that  
341 contains conserved repeats and is highly localized within the nucleus. *Cell* **71**, 527–542  
342 (1992).
- 343 2. Lee, J. T. & Bartolomei, M. S. X-Inactivation, Imprinting, and Long Noncoding RNAs in Health  
344 and Disease. *Cell* **152**, 1308–1323 (2013).
- 345 3. Gutschner, T. *et al.* The noncoding RNA MALAT1 is a critical regulator of the metastasis  
346 phenotype of lung cancer cells. *Cancer Res.* **73**, 1180–1189 (2013).
- 347 4. Clemson, C. M. *et al.* An Architectural Role for a Nuclear Non-coding RNA: NEAT1 RNA is  
348 Essential for the Structure of Paraspeckles. *Mol. Cell* **33**, 717–726 (2009).

- 349 5. Genome Regulation by Long Noncoding RNAs. *Annu. Rev. Biochem.* **81**, 145–166 (2012).
- 350 6. Tseng, Y.-Y. *et al.* PVT1 dependence in cancer with MYC copy-number increase. *Nature*  
351 **512**, 82–86 (2014).
- 352 7. Cabili, M. N. *et al.* Integrative annotation of human large intergenic noncoding RNAs reveals  
353 global properties and specific subclasses. *Genes Dev.* **25**, 1915–1927 (2011).
- 354 8. Derrien, T. *et al.* The GENCODE v7 catalog of human long noncoding RNAs: Analysis of their  
355 gene structure, evolution, and expression. *Genome Res.* **22**, 1775–1789 (2012).
- 356 9. Hacisuleyman, E., Shukla, C. J., Weiner, C. L. & Rinn, J. L. Function and evolution of local  
357 repeats in the Firre locus. *Nat. Commun.* **7**, (2016).
- 358 10. Zhang, B. *et al.* A novel RNA motif mediates the strict nuclear localization of a long non-  
359 coding RNA. *Mol. Cell. Biol.* MCB.01673-13 (2014). doi:10.1128/MCB.01673-13
- 360 11. Miyagawa, R. *et al.* Identification of cis- and trans-acting factors involved in the  
361 localization of MALAT-1 noncoding RNA to nuclear speckles. *RNA* **18**, 738–751 (2012).
- 362 12. Patwardhan, R. P. *et al.* High-resolution analysis of DNA regulatory elements by  
363 synthetic saturation mutagenesis. *Nat. Biotechnol.* **27**, 1173–1175 (2009).
- 364 13. Rosenberg, A. B., Patwardhan, R. P., Shendure, J. & Seelig, G. Learning the Sequence  
365 Determinants of Alternative Splicing from Millions of Random Sequences. *Cell* **163**, 698–711  
366 (2015).
- 367 14. Melnikov, A. *et al.* Systematic dissection and optimization of inducible enhancers in  
368 human cells using a massively parallel reporter assay. *Nat. Biotechnol.* **30**, 271–277 (2012).
- 369 15. Ernst, J. *et al.* Genome-scale high-resolution mapping of activating and repressive  
370 nucleotides in regulatory regions. *Nat. Biotechnol.* **34**, 1180–1190 (2016).
- 371 16. Martin, K. C. & Ephrussi, A. mRNA Localization: Gene Expression in the Spatial  
372 Dimension. *Cell* **136**, 719–730 (2009).

- 373 17. Paquin, N. & Chartrand, P. Local regulation of mRNA translation: new insights from the  
374 bud. *Trends Cell Biol.* **18**, 105–111 (2008).
- 375 18. Bullock, S. L. & Ish-Horowicz, D. Conserved signals and machinery for RNA transport in  
376 *Drosophila* oogenesis and embryogenesis. *Nature* **414**, 611–616 (2001).
- 377 19. Davis, I. & Ish-Horowicz, D. Apical localization of pair-rule transcripts requires 3'  
378 sequences and limits protein diffusion in the *Drosophila* blastoderm embryo. *Cell* **67**, 927–  
379 940 (1991).
- 380 20. Johnstone, O. & Lasko, P. Translational regulation and RNA localization in *Drosophila*  
381 oocytes and embryos. *Annu. Rev. Genet.* **35**, 365–406 (2001).
- 382 21. Lin, A. C. & Holt, C. E. Local translation and directional steering in axons. *EMBO J.* **26**,  
383 3729–3736 (2007).
- 384 22. Rinn, J. & Guttman, M. RNA and dynamic nuclear organization. *Science* **345**, 1240–  
385 1241 (2014).
- 386 23. Oikonomou, P., Goodarzi, H. & Tavazoie, S. Systematic Identification of Regulatory  
387 Elements in Conserved 3' UTRs of Human Transcripts. *Cell Rep.* **7**, 281–292 (2014).
- 388 24. Cabili, M. N. *et al.* Localization and abundance analysis of human lncRNAs at single-cell  
389 and single-molecule resolution. *Genome Biol.* **16**, 20 (2015).
- 390 25. Jaffe, A. E. *et al.* Bump hunting to identify differentially methylated regions in epigenetic  
391 epidemiology studies. *Int. J. Epidemiol.* **41**, 200–209 (2012).
- 392 26. Siepel, A. *et al.* Evolutionarily conserved elements in vertebrate, insect, worm, and yeast  
393 genomes. *Genome Res.* **15**, 1034–1050 (2005).
- 394 27. Siepel, A., Pollard, K. S. & Haussler, D. New Methods for Detecting Lineage-specific  
395 Selection. in *Proceedings of the 10th Annual International Conference on Research in*  
396 *Computational Molecular Biology* 190–205 (Springer-Verlag, 2006).
- 397 doi:10.1007/11732990\_17



- 398 28. Machanick, P. & Bailey, T. L. MEME-ChIP: motif analysis of large DNA datasets.  
399 *Bioinforma. Oxf. Engl.* **27**, 1696–1697 (2011).
- 400 29. Le Cessie, S. & Van Houwelingen, J. C. Ridge Estimators in Logistic Regression. *J. R.*  
401 *Stat. Soc. Ser. C Appl. Stat.* **41**, 191–201 (1992).
- 402 30. An Integrated Encyclopedia of DNA Elements in the Human Genome. *Nature* **489**, 57–  
403 74 (2012).
- 404 31. Levesque, M. J. & Raj, A. Single-chromosome transcriptional profiling reveals  
405 chromosomal gene expression regulation. *Nat. Methods* **10**, 246–248 (2013).
- 406 32. Zhao, S. & Fernald, R. D. Comprehensive algorithm for quantitative real-time  
407 polymerase chain reaction. *J. Comput. Biol. J. Comput. Mol. Cell Biol.* **12**, 1047–1064 (2005).

408

409 **Supplementary Information** is available in the online version of the paper.

410

#### 411 **Acknowledgements**

412 The authors would like to thank Doug Richardson and Sven Terclavers at Harvard Center for  
413 Biological Imaging for assistance with imaging, Ezgi Haceyseleyman for advice on smRNA-FISH  
414 and Bauer Sequencing Facility at Harvard University for assistance with the sequencing. CJS  
415 would like to acknowledge Alejandro Reyes for advice on writing the manuscript and analyzing  
416 the data. The authors would like to thank everyone in the Rinn and Irizarry lab for their advice and  
417 insightful comments throughout this work. This work was supported by NIH grants R01GM083084  
418 and R01HG005220 to RAI as well as NIH grants U01DA040612-01 and P01GM099117 to JLR.

419

#### 420 **Author Contributions**

421 These authors contributed equally to this work.

422 Philipp G Maass, John L Rinn

423

424 **Author Information**

425

426 **Tables**

427

428 **Extended Data Table 1:** A table describing the meta data of the oligo pool used in this work.

429 **Extended Data Table 2:** A table describing the 109 DRs discovered in this work.

430

431 **Figure Legends**

432

433 **Figure 1. A Massively Parallel Reporter Assay to identify RNA nuclear enrichment signals.**

434 **A.** Experimental overview. *Far left:* oligonucleotide pool design. Double-stranded DNA (dsDNA)  
435 oligonucleotides were designed by computationally scanning 38 parental lncRNA transcripts  
436 (“lncRNA cDNAs,” **Extended Data Table 1**) in 110 bp windows, with 10 bp spacing between  
437 sequential oligos. These lncRNA-derived “Variable Sequences” (gray) were appended with  
438 unique barcodes and primer binding sites, resulting in a pool of 11,969 oligos (**Supplementary**  
439 **Data 1**). The vertical lines in the lncRNA denote splice junctions. *Second from left:* schematic  
440 summarizing the design of each pool oligonucleotide. *Second from right:* Reporter design. The  
441 oligonucleotide pool was cloned into a reporter plasmid as a transcriptional fusion at the 3’-  
442 terminus of the fsSox2 gene. pA: polyadenylation sequence *Far right:* MPRA workflow. The  
443 Sox2~oligo reporter pool is transiently transfected into HeLa cells. Following 48h of expression,  
444 cells are subsequently fractionated to isolate nuclei, and the nuclear enrichment of each pool  
445 member is quantified by targeted RNA sequencing (*not shown*). Matched whole-cell lysates from  
446 unfractionated cells serve as controls. **B–C.** Differential Region-calling correctly identifies nuclear  
447 retention elements in *MALAT1*. Solid lines: per-nucleotide abundances in the nuclear (red) and

448 whole-cell (gray) fractions, modeled for each position along the *MALAT1* transcript, based on the  
449 aggregate behavior of all oligos containing that nucleotide (*Methods*). Shaded regions: standard  
450 deviations. Median values for six biological replicates are shown. **D.** Boxplot comparing the  
451 nuclear enrichment for all nucleotides within differential regions (“DRs”), relative to all the other  
452 nucleotides surveyed (“Non DRs”). *P*-value: Mann Whitney Test.

453

454 **Figure 2. Novel lncRNA nuclear enrichment signals. A–E.** Identification of Differential Regions  
455 within lncRNAs with different subcellular localization patterns. Data are depicted as in **Figure 1C**.  
456 Established subcellular localization patterns range from: **A.** those occupying a single, prominent  
457 nuclear focus (*ANRIL*, FISH Class 1), to: **E.** those exhibiting a diffuse, mostly cytosolic pattern  
458 (*NR\_024412*, FISH Class 5)<sup>24</sup>. **F.** The number of Differential Regions discovered within lncRNAs  
459 from each FISH Class correlates with that class’s degree of nuclear localization. **G.** Differential  
460 Regions are more highly conserved than are most lncRNA sequences. Cumulative distribution  
461 function (CDF) of phastCons scores comparing nucleotides within Differential Regions (*red*), to  
462 all other nucleotides within the oligo pool (*gray*). *P*-value: Mann Whitney Test.

463

464 **Figure 3. Motifs enriched in lncRNA nuclear enrichment signals. A.** Position Weight Matrix  
465 (PWM) for a novel 57 nt motif enriched within the DRs of lncRNA *XIST*, discovered using MEME<sup>28</sup>.  
466 E-value < 0.05 **B.** Occurrences of this motif throughout the *XIST* locus. **C.** Multiple sequence  
467 alignment of the incidences of this *XIST* motif (*colored nucleotides*) within Differential Regions.  
468 Adjoining sequences are colored in gray. **D.** PWM for a novel C-rich 15 nt motif enriched within  
469 the DR’s of 21 different lncRNAs, discovered using MEME. E-value < 0.05 **E.** The occurrences of  
470 this motif throughout the *MALAT1* locus. **F.** Multiple sequence alignment of different instances of  
471 this motif (*colored nucleotides*), as they appear in the Differential Regions of the indicated  
472 lncRNAs. **G.** Oligos bearing the novel motifs described in **A–F** and **Extended Data Figure 4** are

473 significantly enriched in nuclear fractions, relative to all other oligos in the MPRA pool. *P*-value:  
474 Mann Whitney Test. **H–I** . Novel nuclear enrichment motifs influence the localization of  
475 endogenous human transcripts. CDF plot comparing the nuclear enrichment of all human  
476 transcripts with at least one occurrence of our discovered motifs, relative to all other transcripts,  
477 in HeLa and A549 cells<sup>30</sup>. *P*-value: Mann Whitney Test.

478

479 **Figure 4. Differential Regions are sufficient to redirect RNA subcellular localization A-B.**

480 Representative *XIST* and C-Rich motif regions and novel Differential Regions from lncRNAs  
481 *TUG1* and *XIST* that are examined in **B–D**. Data depicted as in **Figure 1C**. **B–C**. Experimental  
482 overview of single-molecule RNA FISH (smRNA–FISH) experiments. Sox2 reporter constructs  
483 fused to individual motifs are transiently expressed in HeLa cells, and the resulting fusion  
484 transcripts are imaged using a common probe set targeting fsSox2<sup>9,31</sup>. Representative smRNA-  
485 FISH images demonstrating the behavior of (*left*) the unmodified fsSox2 reporter, (*middle*) the  
486 reporter fused to three tandem instance of the *XIST*-derived motif (“Motif1”), and (*right*) the  
487 reporter fused to three tandem instances of the C-rich motif (“Motif2”). Scale bars are the same  
488 for all images. Blue: Hoechst 33342 Representative smRNA-FISH images of HeLa cells  
489 transiently expressing the indicated Sox2 reporter constructs: unmodified fsSox2, MALAT1  
490 Region M (*second from left*), *TUG1* Differential Region (*second from right*) and *XIST* Differential  
491 Region (*right most*). Data were collected using the experimental scheme outlined above. Scale  
492 bars are the same for all images. **E**. Quantification of the apparent nuclear localization of Sox2  
493 reporter constructs, fused to the indicated Motifs, as observed using smRNA-FISH (*Methods*) *P*-  
494 value: Mann Whitney Test.

495

496

497

498 **Figure 1**

499

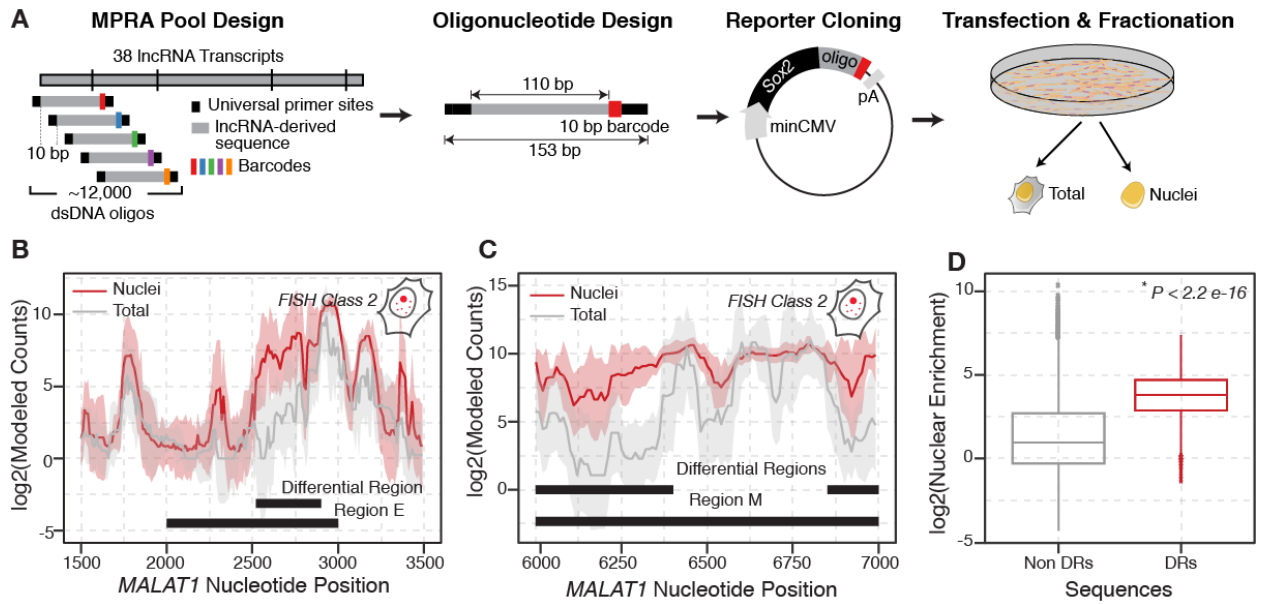

500

501

502

503

504

505

506

507

508

509

510

511

512

513

514

515 **Figure 2**

516

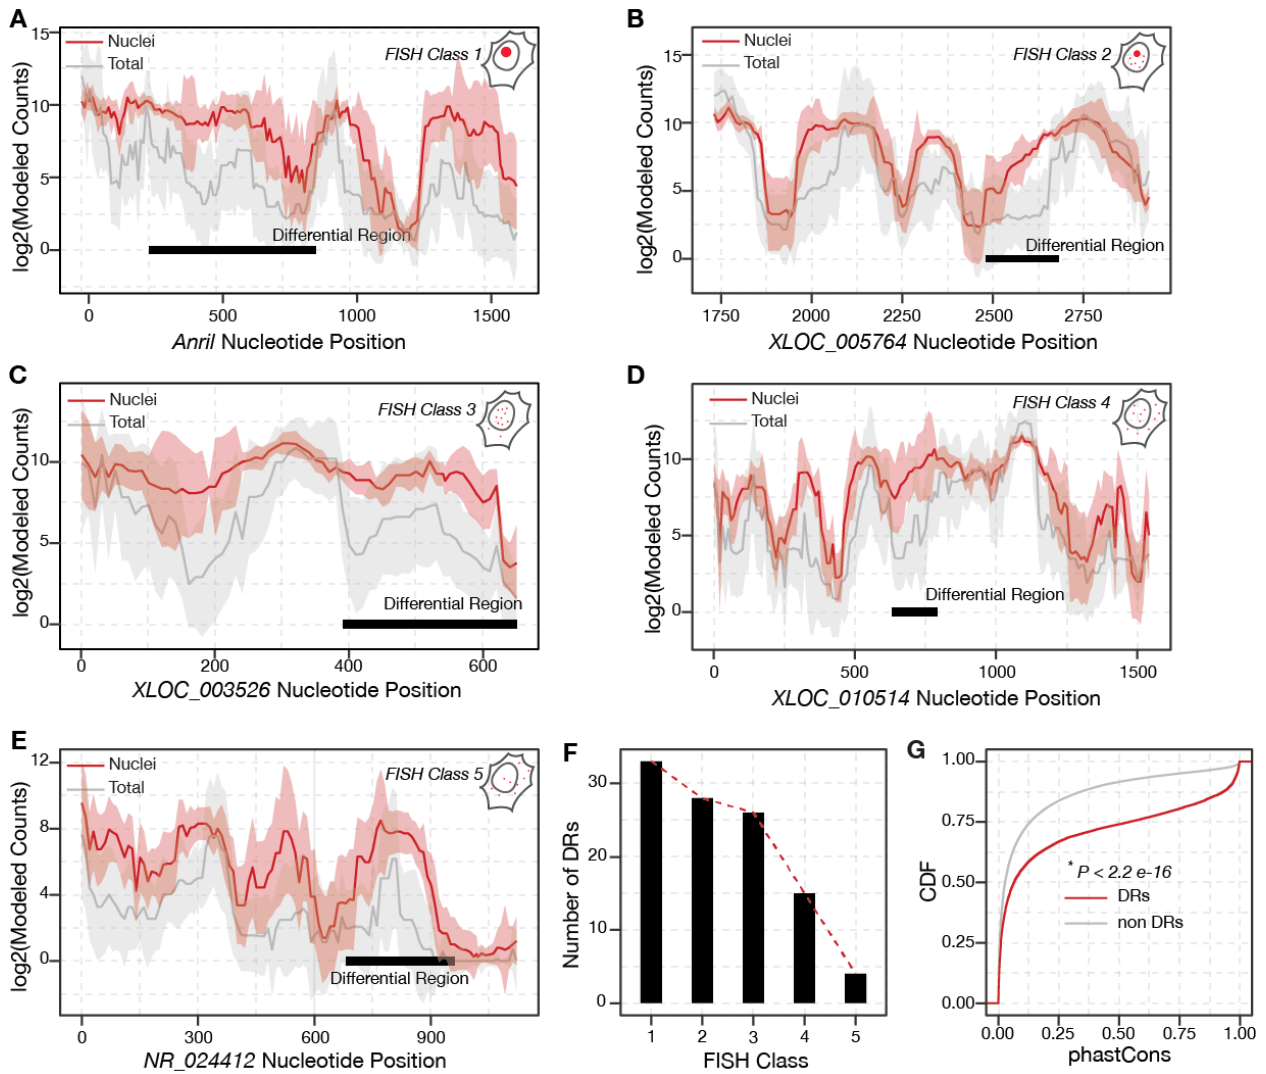

517

518

519

520

521

522

523

524



536 **Figure 4**

537

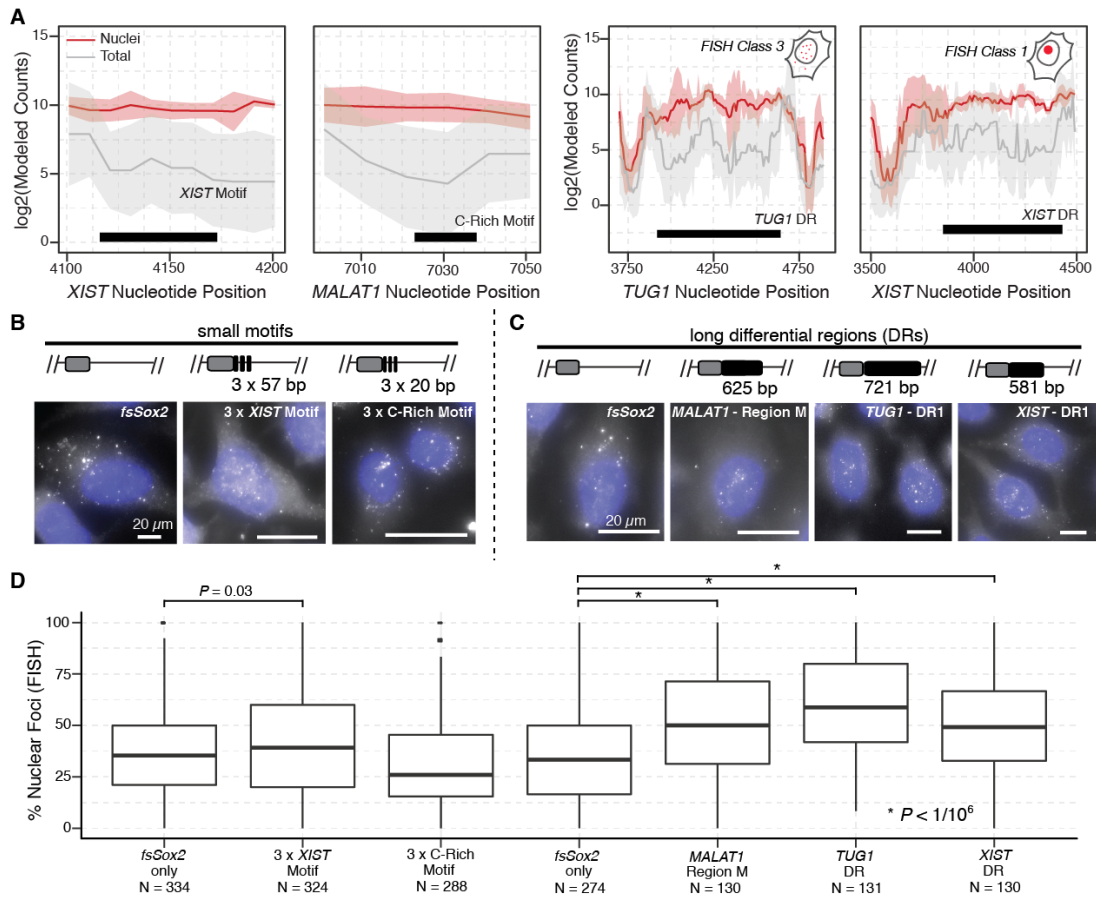



548 **Extended Data Figure Legends:**

549

550 **Figure 1. Computational pipeline to identify nuclear enrichment signals from MPRA data.**

551 **A.** Post fractionation, RNA from the nucleus and whole cell lysate is extracted. Using the universal  
552 primer sequences, the oligos are amplified in a targeted manner to make the library which is sent  
553 for sequencing. **B.** The first step in the analysis process is to map the reads back to the oligo pool.  
554 Due to the dense tiling of lncRNAs in our pool, we ensure there is a perfect match between the  
555 first 10 nucleotides of the read and the barcode sequence to ‘map’ the read. Next, we require the  
556 upstream 90 bps to only have 2 mismatches to guarantee robustness of the mapping procedure.  
557 This step is performed by the ‘mapReads’ function in our package which gives a table of counts  
558 for each oligo as the output. This counts table is subsequently normalized for library size using  
559 the ‘normCounts’ table. We provide this normalized counts table along with the data on GEO **C.**  
560 Based on the normalized counts for each oligo, counts for each nucleotide are modeled next. As  
561 shown in the schematic, if a nucleotide ‘A’ overlaps with oligos  $i_1$ ,  $i_2$ ,  $i_3$  and  $i_4$  the counts for the  
562 nucleotide A are modeled by taking the median of counts for each of the individual oligos  $i_1 - i_4$ .  
563 We use the ‘modelNucCounts’ function in our package for this and get a counts table for each  
564 nucleotide in all the 12 samples (6 nuclei and 6 total) as the output (**Supplementary File 2**). **D.**  
565 Using the nucleotide counts table, we infer differential regions by 1). Finding candidate regions  
566 and assigning a summary statistic to each one of them and 2). Generating null candidates by  
567 permuting sample labels and using them to assign an empirical p-value to our candidate regions  
568 from Step 1. Please see Methods for more details (*Inset*) A distribution of the summary statistic  
569 generated for the data we present in the paper – the red line shows the cutoff used to decide the  
570 ‘significant’ candidates.

571

572 **Figure 2. Quality Control for Various MPRA Steps** Since the MPRA has several steps, we  
573 used controls at every stage to make sure the assay was working as designed **A.** The distribution  
574 of oligo's in our cloned plasmid pool. We see that (i). there is very little jackpotting (just a single  
575 peak showing uniform counts for several different oligos) and (ii). we have almost the entire pool  
576 represented (very small bump at zero counts). **B.** The nuclear enrichment of *NEAT1*, *GAPDH* and  
577 *SNHG5* as determined by qRT-PCR (*Methods*). The error bars represent standard deviation for  
578 each measurement. We see that the lncRNA *NEAT1* (green) is enriched in the nuclear fraction  
579 as expected while The 'control' represents the enrichment of the genes in untransfected cells  
580 (*Inset*) The median enrichment of the genes across all 6 replicates. **C.** A representative image of  
581 HeLa cells co-transfected with a GFP plasmid using the protocol outlined in Methods showing  
582 that we achieve a high transfection efficiency. **D.** The number of oligos 'missing' (i.e. with zero  
583 counts) from each of our 12 samples. We see that we recover >70% of our initial pool in each  
584 sample and looking across the 6 samples for nucleus and total, only 0.2% oligos (i.e. ~25 oligos)  
585 are missing from the nuclear samples and ~0.4% (i.e. ~50 oligos) are missing from the total  
586 sample.

587  
588 **Figure 3 Mapping Rates for our different samples** A bar plot showing the mapping percentage  
589 for all reads of different samples from nuclear fraction (N) and total fraction (T). We show the  
590 mapping rates separately for the 2 technical replicates (TR) and each of the 6 biological replicates  
591 (BR).

592  
593 **Figure 4 Difference between counts of technical replicates** A boxplot showing difference  
594 between counts of same oligo between the 2 technical replicates. We see that many oligos show  
595 very low difference in counts among technical replicates and thus there is very low technical  
596 variance.

597

598 **Figure 5 Biological Validation of MPRA Using the *FIRRE* locus** Similar to the MALAT1 Region

599 M and Region E we used to ensure our MPRA was working robustly, we can also use the RRD

600 region from the *FIRRE* locus. **A.** The MPRA recapitulates the function of known RNA nuclear

601 retention element – RRD. Since, the experiment was performed in human cells, we expect RRD

602 derived from human *FIRRE* to positively influence nuclear enrichment while the RRD derived from

603 mouse *FIRRE* will not influence nuclear enrichment of fsSox2. Here, we show a CDF plot of the

604 nucleotides overlapping human RRD, mouse RRD and other nucleotides in the human and mouse

605 *FIRRE* loci. *P*-value: Mann Whitney Test. **B.** Differential Region-calling correctly identifies nuclear

606 retention elements in *FIRRE*. Solid lines: per-nucleotide abundances in the nuclear (red) and

607 whole-cell (gray) fractions, modeled for each position along the *FIRRE* transcript, based on the

608 aggregate behavior of all oligos containing that nucleotide (*Methods*). Shaded regions: standard

609 deviations. Median values for six biological replicates are shown.

610

611 **Figure 6 Sequence Features of Differential Regions** **A.** A boxplot showing the length

612 distribution of the differential regions generated by our method. We see that most of our differential

613 regions are longer than 110 bp oligo nucleotide we started with. **B.** A scatter plot showing the

614 relationship between number of differential regions in a lncRNA (X-axis) and the length of the

615 lncRNA (Y-axis). The blue line shows the loess fit and the shaded region is the confidence interval

616 around the fit. **C.** A bar graph comparing GC content of DRs and non DRs which shows there is

617 no noticeable difference in GC content.

618

619 **Figure 7 Motifs enriched in lncRNA nuclear enrichment signals. A-D.** Position Weight Matrix

620 (PWM) for a novel motifs enriched in DR sequences found using MEME software. While motif in

621 panel A is similar to the C-rich motif in **Figure 4D** the other 3 motifs are found in XIST and similar

622 to the XIST specific motif in **Figure 4A** E-Value < 0.05. **E.** k-mers mildly predictive of DR found  
623 using ridge regression. The color describes the weight of the kmer assigned by the ridge  
624 regression algorithm (*Methods*).

625

626 **Figure 8 Novel C-rich motif can influence the localization of endogenous human**  
627 **transcripts.** CDF plot comparing the nuclear enrichment of all human transcripts with at least one  
628 occurrence of our discovered motifs, relative to all other transcripts, in all ENCODE Tier 2 cells<sup>30</sup>.  
629 *P*-value: Mann Whitney Test.

630

631

632

633

634

635

636

637

638

639

640

641

642

643

644

645

646

647 **Extended Data Figure 1**

648

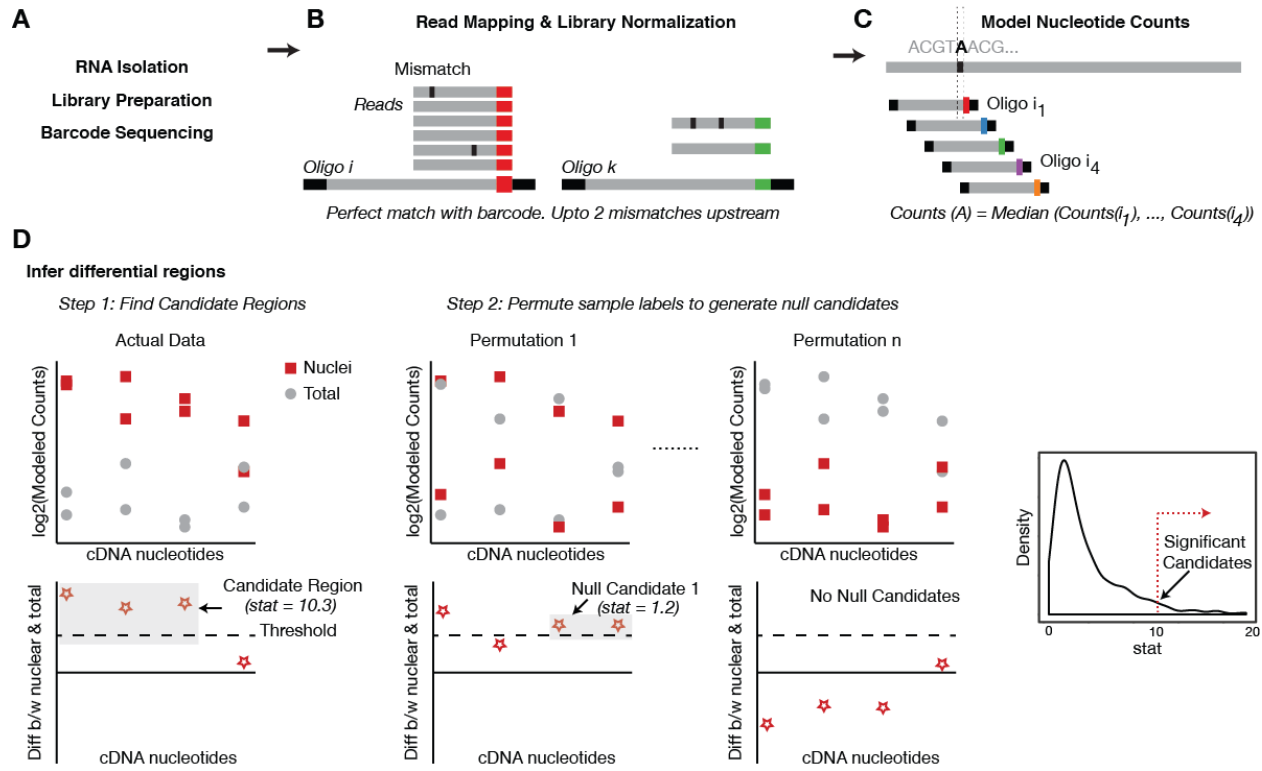

649

650

651

652

653

654

655

656

657

658

659

660

661 **Extended Data Figure 2**

662

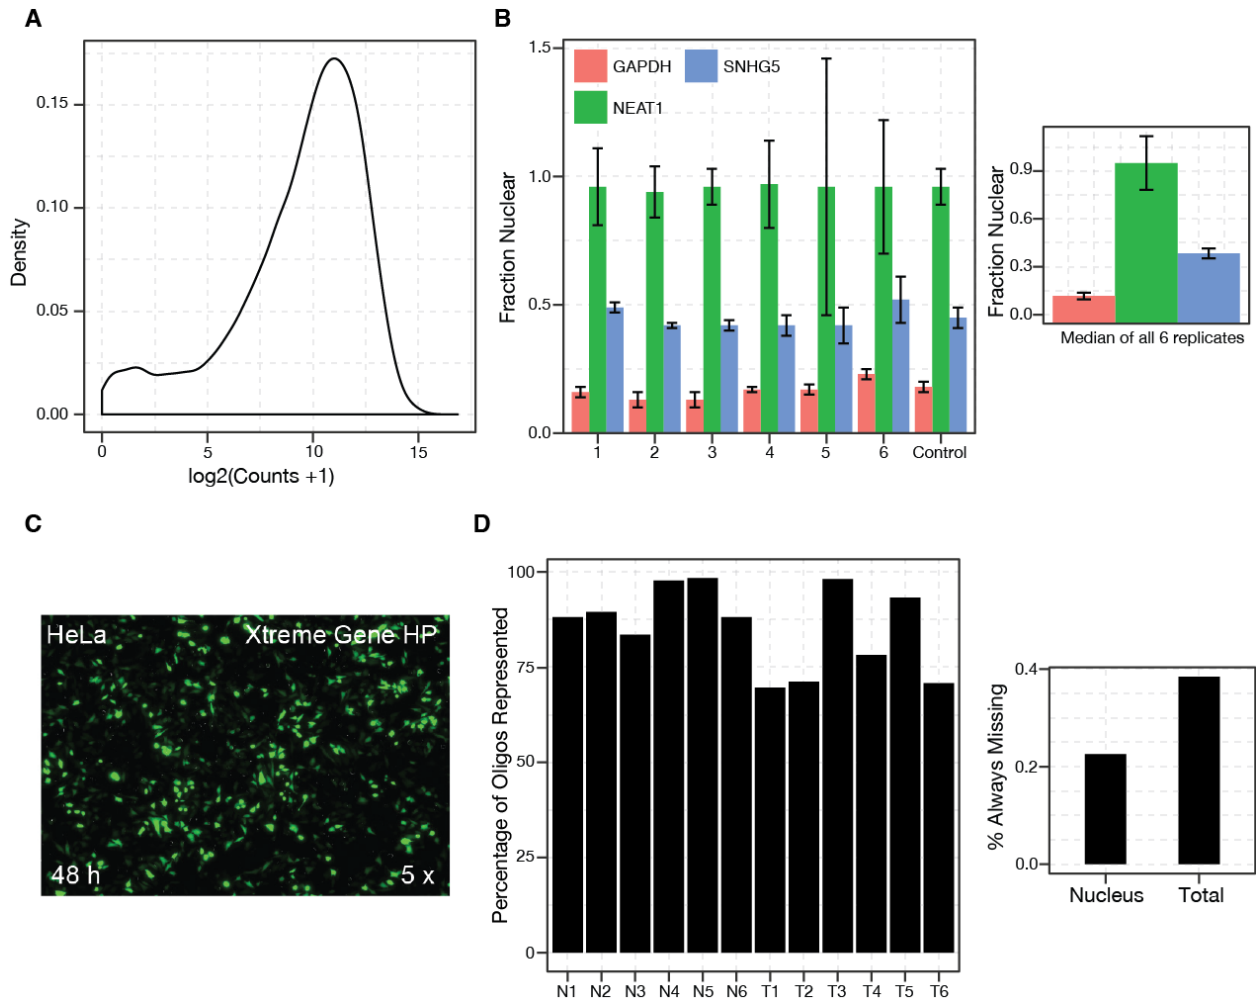

663

664

665

666

667

668

669

670

671

672 **Extended Data Figure 3**

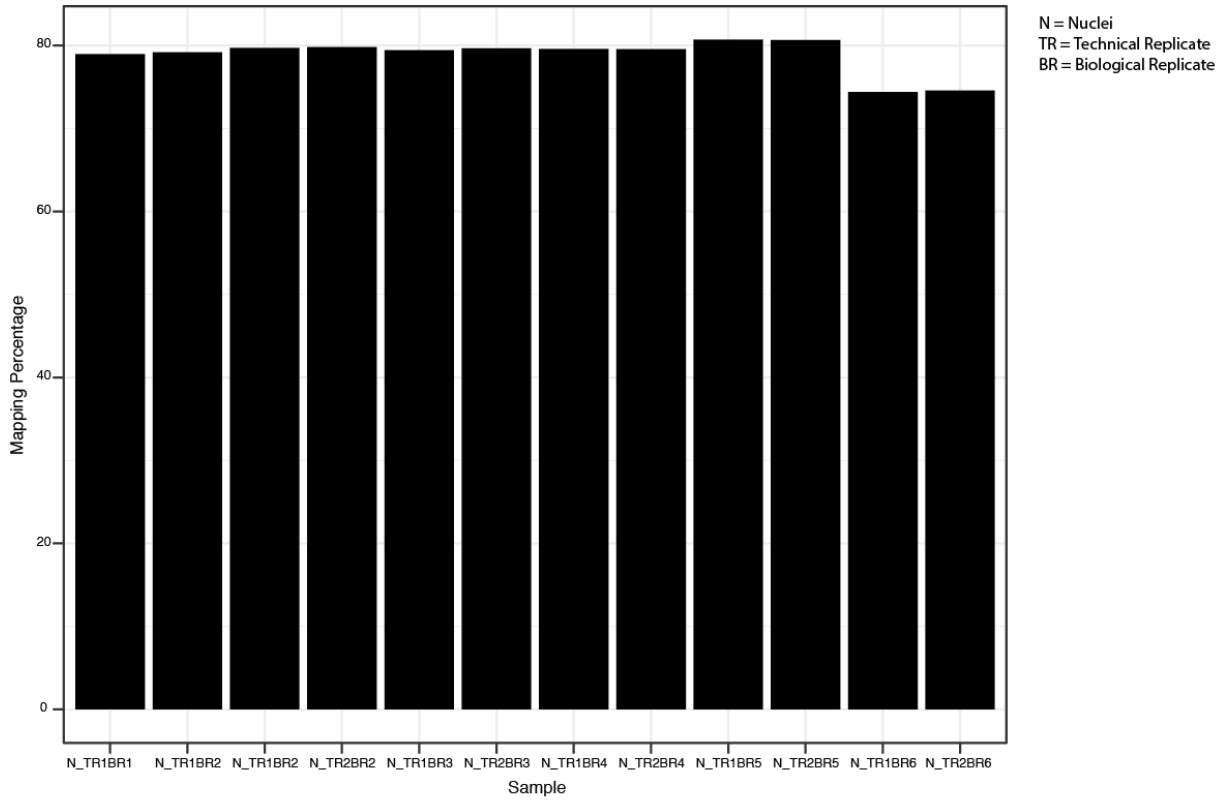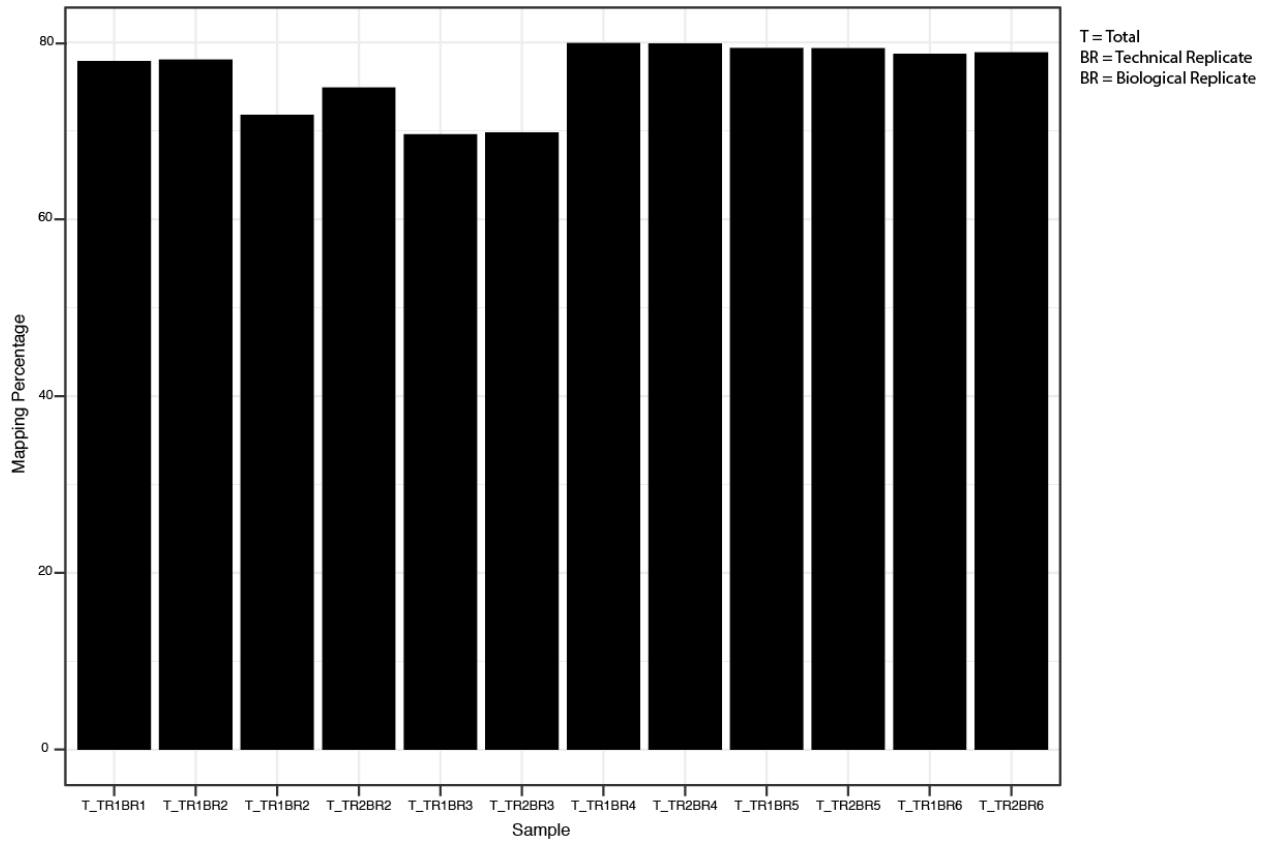

674 **Extended Data Figure 4**

675

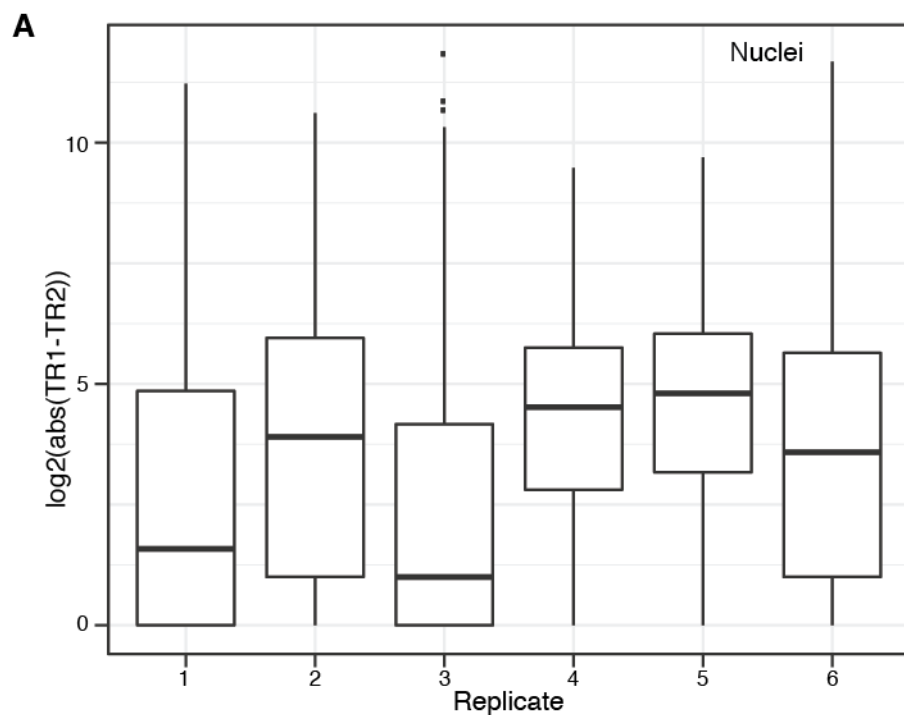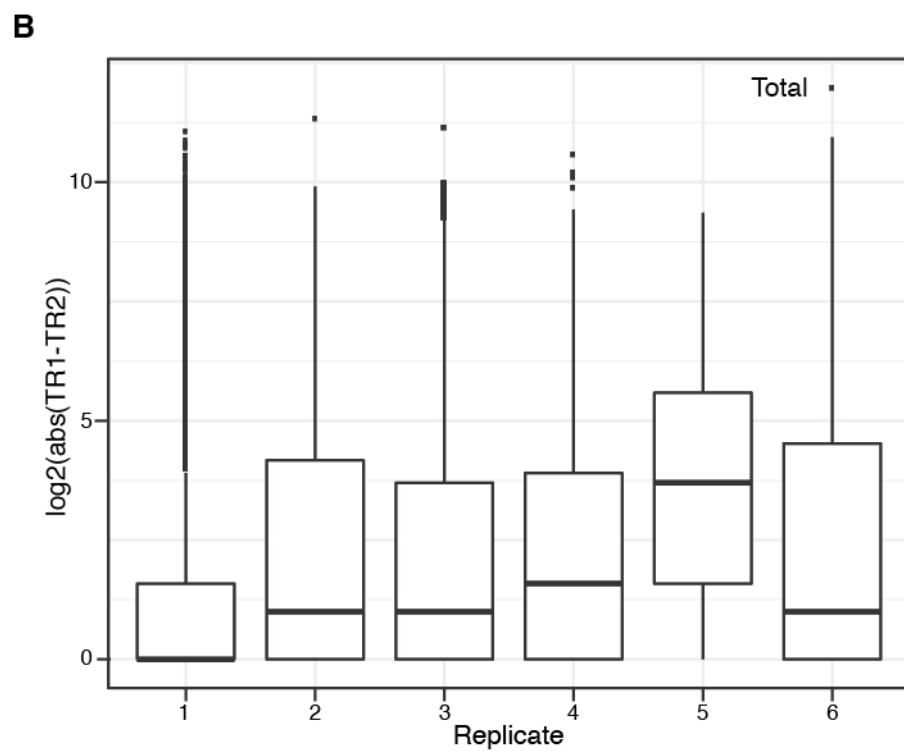

676



677 **Extended Data Figure 5**

678

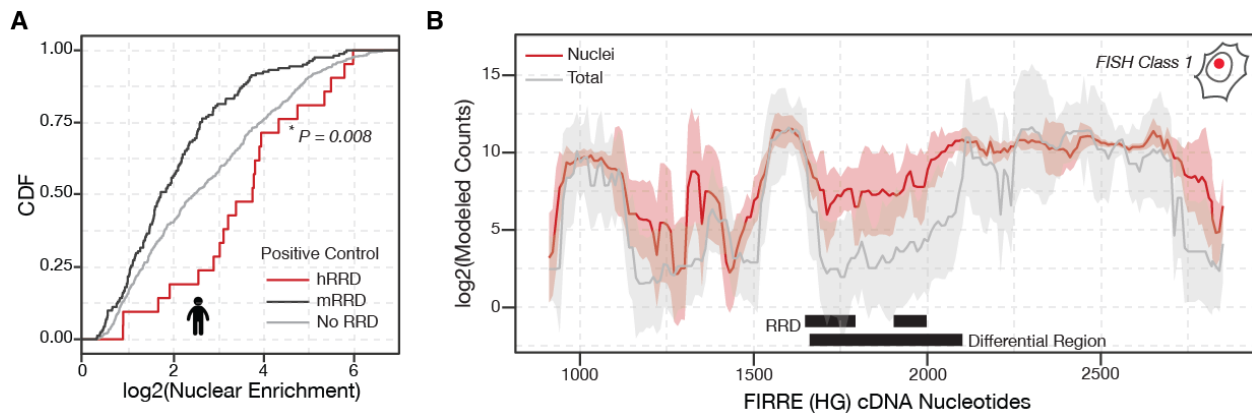

679

680

681

682

683

684

685

686

687

688

689

690

691

692

693

694

695

696 **Extended Data Figure 6**

697

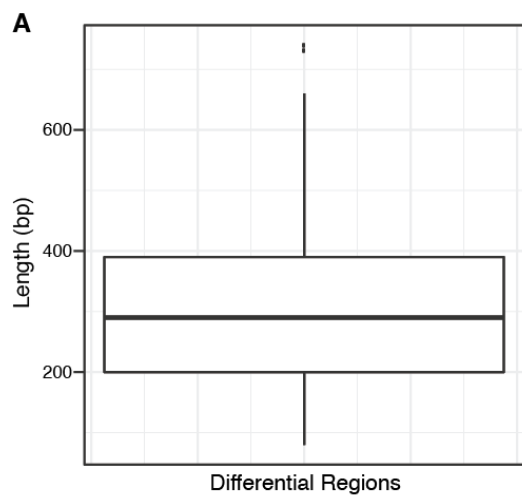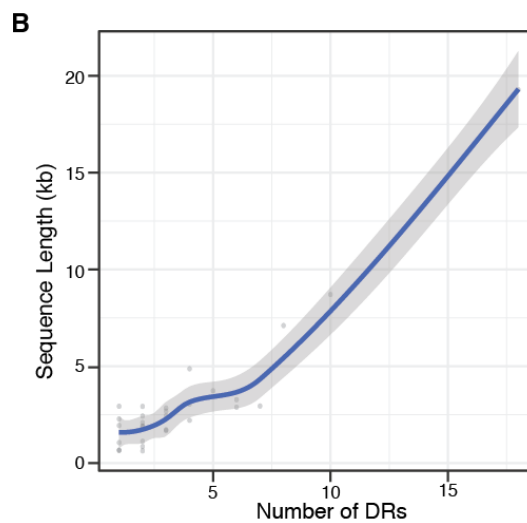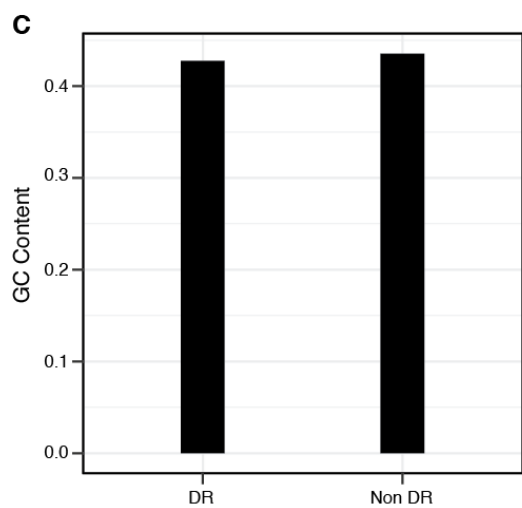

698

699

700

701

702

703

704

705

706

707 **Extended Data Figure 7**

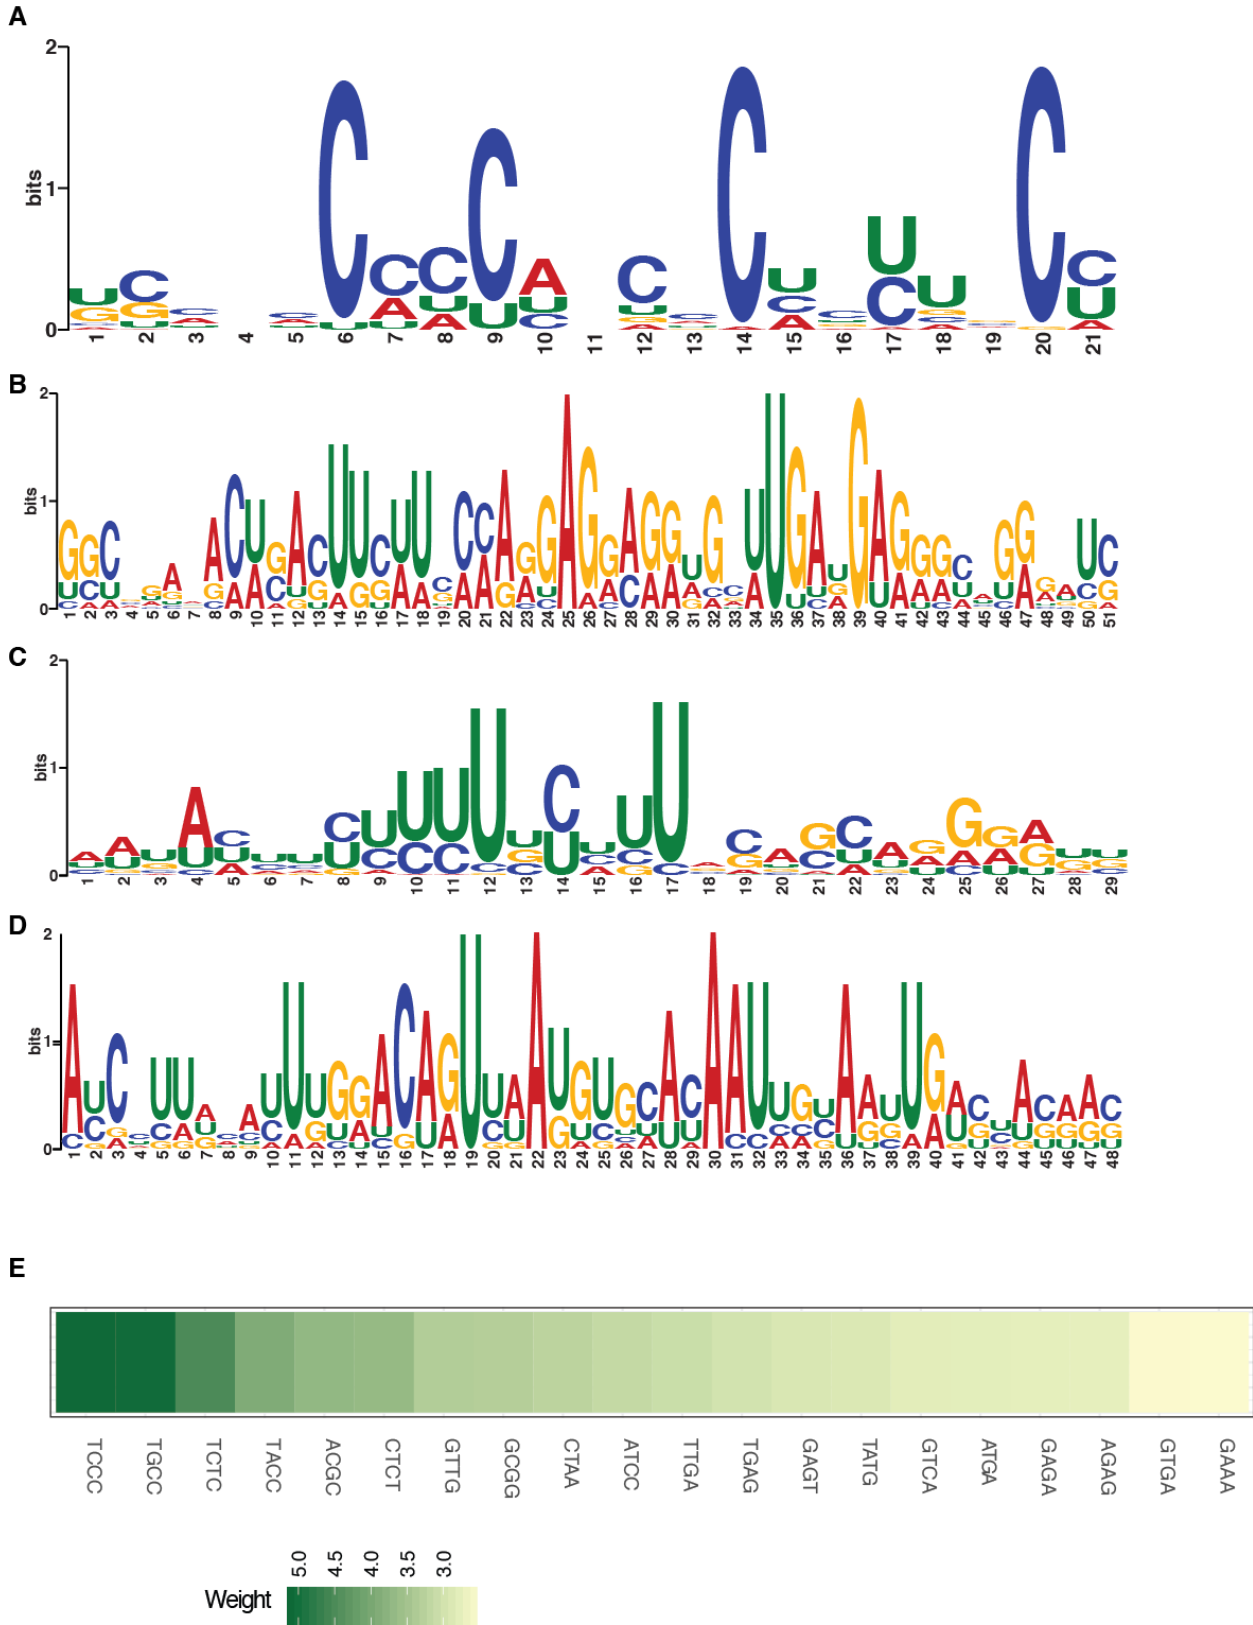

709 **Extended Data Figure 8**

710

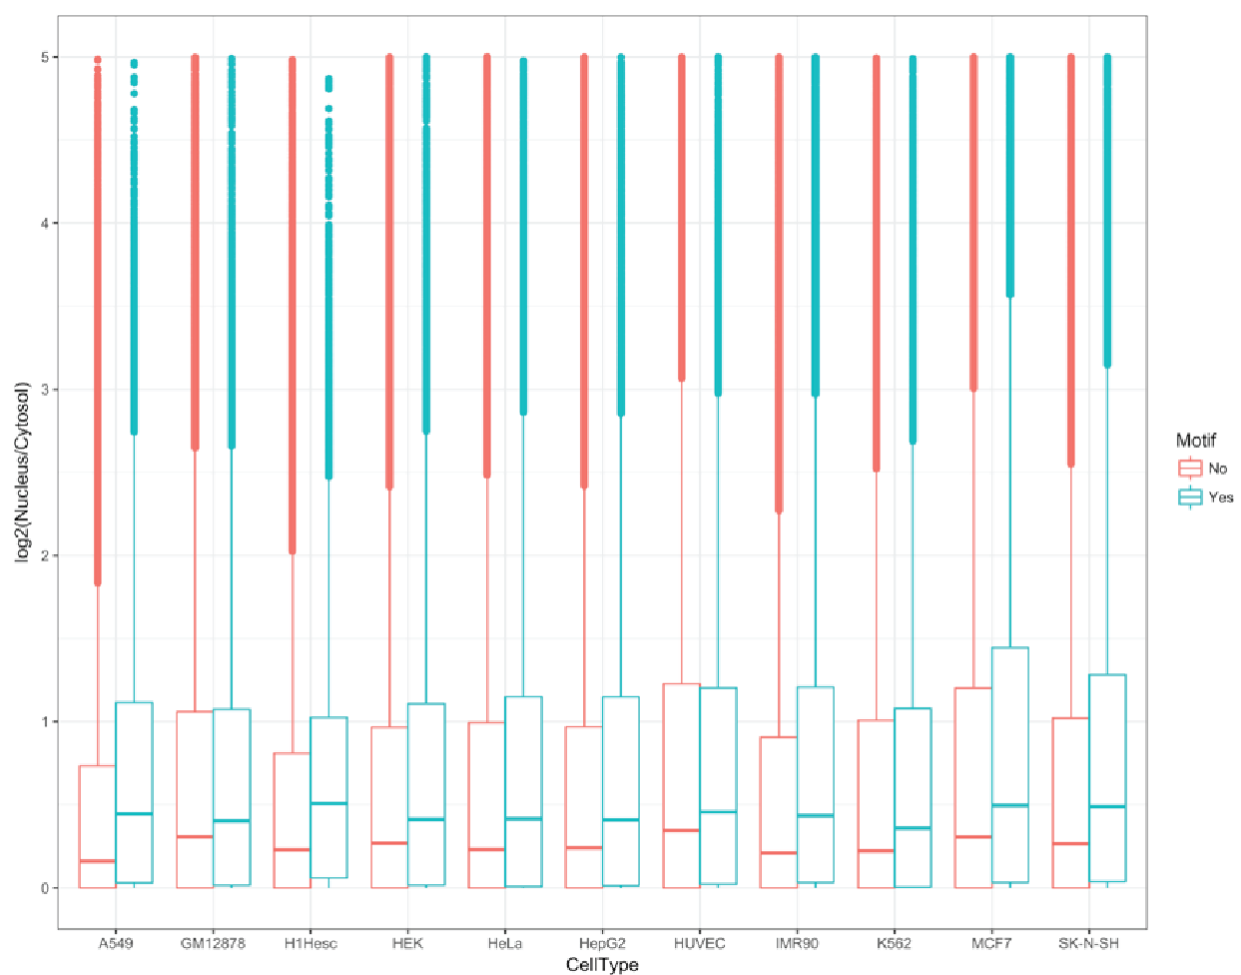

711

712

713

714

715

716

717

718

719

720 **Extended Data Table 1**

721

| txnNum | seqid        | name1             | name2                | startIndex | numOfOligos | seqLen | fishClass | window |
|--------|--------------|-------------------|----------------------|------------|-------------|--------|-----------|--------|
| 1      | 76_1_75      | ANCR              | NR_024031            | 0          | 76          | 855    | 4         | 10     |
| 2      | 234_2_157    | Anril             | NR_003529            | 75         | 158         | 1676   | 1         | 10     |
| 3      | 509_3_274    | BORG              | AB010885             | 232        | 275         | 2846   | *         | 10     |
| 4      | 708_4_198    | ENST00000606034.1 | ENST00000606034.1    | 506        | 199         | 2086   | *         | 10     |
| 5      | 991_5_282    | FIRRE(HG)         | NR_026975            | 704        | 283         | 2928   | 1         | 10     |
| 6      | 1469_6_477   | FIRRE(MM)         | NR_026976            | 986        | 478         | 4872   | 1         | 10     |
| 7      | 1523_7_53    | GAS5              | NR_002578            | 1463       | 54          | 632    | 2         | 10     |
| 8      | 2384_8_860   | MALAT1            | NR_002819            | 1516       | 861         | 8708   | 2         | 10     |
| 9      | 2547_9_162   | Meg3              | NR_033358            | 2376       | 163         | 1722   | 2         | 10     |
| 10     | 2911_10_363  | NEAT1             | NR_028272            | 2538       | 364         | 3735   | 2         | 10     |
| 11     | 3014_11_102  | NR_024412         | NR_024412            | 2901       | 103         | 1127   | 5         | 10     |
| 12     | 3250_12_235  | NR_029435         | NR_029435            | 3003       | 236         | 2457   | 3         | 10     |
| 13     | 3286_13_35   | TERC              | NR_001566            | 3238       | 36          | 451    | 2         | 10     |
| 14     | 3987_14_700  | TUG1              | NR_002323            | 3273       | 701         | 7104   | 3         | 10     |
| 15     | 5905_15_1917 | XIST              | NR_001564            | 3973       | 1918        | 19280  | 1         | 10     |
| 16     | 5961_16_55   | XLOC_002094       | TCONS_00005148       | 5890       | 56          | 660    | 4         | 10     |
| 17     | 6057_17_95   | XLOC_002408       | NR_040001            | 5945       | 96          | 1058   | 4         | 10     |
| 18     | 6375_18_317  | XLOC_002746       | NR_028301            | 6040       | 318         | 3278   | 3         | 10     |
| 19     | 6431_19_55   | XLOC_003526       | TCONS_00007523       | 6357       | 56          | 653    | 3         | 10     |
| 20     | 6494_20_62   | XLOC_004456       | NR_039993            | 6412       | 63          | 730    | 3         | 10     |
| 21     | 6727_21_232  | XLOC_004803       | TCONS_00010926       | 6474       | 233         | 2429   | 4         | 10     |
| 22     | 7022_22_294  | XLOC_005151       | DB2.2_TCONS_00023484 | 6706       | 295         | 3047   | 1         | 10     |
| 23     | 7306_23_283  | XLOC_005764       | NR_026807            | 7000       | 284         | 2933   | 2         | 10     |
| 24     | 7488_24_181  | XLOC_006922       | NR_003367            | 7283       | 182         | 1918   | 1         | 10     |
| 25     | 7767_25_278  | XLOC_008174       | NR_015353            | 7464       | 279         | 2886   | 4         | 10     |
| 26     | 7825_26_57   | XLOC_009233       | NR_038903            | 7742       | 58          | 673    | 3         | 10     |
| 27     | 8005_27_179  | XLOC_009702       | NR_040245            | 7799       | 180         | 1895   | 4         | 10     |
| 28     | 8216_28_210  | XLOC_010017       | NR_028045            | 7978       | 211         | 2208   | 3         | 10     |
| 29     | 8401_29_184  | XLOC_010514       | NR_044993            | 8188       | 185         | 1942   | 4         | 10     |
| 30     | 8619_30_217  | XLOC_011185       | NR_023915            | 8372       | 218         | 2280   | 4         | 10     |
| 31     | 8799_31_179  | XLOC_011226       | NR_026757            | 8589       | 180         | 1894   | 4         | 10     |
| 32     | 8854_32_54   | XLOC_011950       | NR_034106            | 8768       | 55          | 650    | 4         | 10     |

|    |                   |                |            |      |      |       |   |    |
|----|-------------------|----------------|------------|------|------|-------|---|----|
| 33 | 9053_33_198       | XLOC_012599    | NR_033770  | 8822 | 199  | 2090  | 5 | 10 |
| 34 | 9123_34_69        | XLOC_L2_008203 | NR_015395  | 9020 | 70   | 793   | 4 | 10 |
| 35 | 9134_35_10        | lincFOXF1      | NR_036444  | 9089 | 11   | 206   | 4 | 10 |
| 36 | 9419_36_284       | lincMKLN1_A1   | NR_015431  | 9099 | 285  | 2948  | 2 | 10 |
| 37 | 9678_37_258       | lincSFPQ       | uc001byq.3 | 9383 | 259  | 2685  | 3 | 10 |
| 38 | 11969_38_22<br>90 | kcnq1ot1       | NR_002728  | 9679 | 2291 | 91671 | 1 | 40 |

722

723

724

725

726

727

728

729

730

731

732

733

734

735

736

737

738

739

740

741

742 **Extended Data Table 2**

743

| chr          | start | end   | indexStart | indexEnd | length | stat        | pval        | qval        |
|--------------|-------|-------|------------|----------|--------|-------------|-------------|-------------|
| TUG1         | 3921  | 4641  | 3822       | 3894     | 73     | 19.78425693 | 1.37E-04    | 0.032707591 |
| XIST         | 3851  | 4431  | 4527       | 4585     | 59     | 18.93234834 | 1.37E-04    | 0.032707591 |
| BORG         | 1751  | 2481  | 432        | 505      | 74     | 18.02645224 | 1.92E-04    | 0.032707591 |
| XLOC_005151  | 591   | 981   | 7015       | 7054     | 40     | 17.56243041 | 1.92E-04    | 0.032707591 |
| NEAT1        | 1221  | 1561  | 2769       | 2803     | 35     | 16.33411768 | 3.01E-04    | 0.035043848 |
| FIRRE(MM)    | 71    | 561   | 1054       | 1103     | 50     | 16.23299636 | 3.29E-04    | 0.035043848 |
| FIRRE(MM)    | 1551  | 2201  | 1202       | 1267     | 66     | 15.82546972 | 3.84E-04    | 0.035043848 |
| MALAT1       | 5471  | 5951  | 2148       | 2196     | 49     | 15.41161228 | 4.11E-04    | 0.035043848 |
| MALAT1       | 5971  | 6401  | 2198       | 2241     | 44     | 15.08001304 | 4.93E-04    | 0.037380104 |
| TUG1         | 2521  | 2931  | 3682       | 3723     | 42     | 14.64829348 | 6.03E-04    | 0.041118115 |
| Anril        | 251   | 871   | 113        | 175      | 63     | 14.18387442 | 7.95E-04    | 0.044568586 |
| XIST         | 18601 | 19141 | 6002       | 6056     | 55     | 13.83398428 | 8.22E-04    | 0.044568586 |
| XLOC_010017  | 81    | 311   | 8308       | 8331     | 24     | 13.78124507 | 8.50E-04    | 0.044568586 |
| XIST         | 951   | 1191  | 4237       | 4261     | 25     | 13.63602836 | 9.59E-04    | 0.045790628 |
| MALAT1       | 4711  | 5121  | 2072       | 2113     | 42     | 13.55591772 | 0.001068786 | 0.045790628 |
| TUG1         | 3101  | 3501  | 3740       | 3780     | 41     | 13.4734457  | 0.001123596 | 0.045790628 |
| lincMKLN1_A1 | 1871  | 2341  | 9701       | 9748     | 48     | 13.46301764 | 0.001151    | 0.045790628 |
| XIST         | 1601  | 1731  | 4302       | 4315     | 14     | 13.30739043 | 0.001315429 | 0.045790628 |
| XLOC_009702  | 21    | 361   | 8111       | 8145     | 35     | 13.12962204 | 0.001342834 | 0.045790628 |
| FIRRE(HG)    | 1661  | 2101  | 919        | 963      | 45     | 13.09486481 | 0.001342834 | 0.045790628 |
| XLOC_002746  | 1131  | 1661  | 6356       | 6409     | 54     | 13.04185855 | 0.001425048 | 0.045946378 |
| ANCR         | 571   | 851   | 58         | 87       | 30     | 12.98651091 | 0.001507262 | 0.045946378 |
| XLOC_012599  | 151   | 621   | 9217       | 9264     | 48     | 12.90796589 | 0.001616881 | 0.045946378 |
| XIST         | 8631  | 8951  | 5005       | 5037     | 33     | 12.84592969 | 0.001616881 | 0.045946378 |
| XLOC_002746  | 1711  | 2031  | 6414       | 6446     | 33     | 12.53548694 | 0.001890929 | 0.051584544 |
| BORG         | 31    | 421   | 260        | 299      | 40     | 12.18400479 | 0.002329405 | 0.056070156 |
| XIST         | 7201  | 7431  | 4862       | 4885     | 24     | 12.15842074 | 0.002329405 | 0.056070156 |
| XLOC_005151  | 41    | 161   | 6960       | 6972     | 13     | 12.13686517 | 0.00235681  | 0.056070156 |
| lincSFPQ     | 201   | 551   | 9830       | 9865     | 36     | 12.04103864 | 0.002439024 | 0.056070156 |
| TUG1         | 6221  | 6561  | 4052       | 4086     | 35     | 11.96916084 | 0.002548643 | 0.056070156 |
| XIST         | 15631 | 16081 | 5705       | 5750     | 46     | 11.96071375 | 0.002548643 | 0.056070156 |
| XLOC_002746  | 2791  | 3091  | 6522       | 6552     | 31     | 11.77047577 | 0.002877501 | 0.059716996 |
| XLOC_005151  | 1331  | 1691  | 7089       | 7125     | 37     | 11.68301868 | 0.00298712  | 0.059716996 |
| XLOC_003526  | 391   | 651   | 6611       | 6638     | 28     | 11.57276775 | 0.003178953 | 0.059716996 |

|              |       |       |      |       |    |             |             |             |
|--------------|-------|-------|------|-------|----|-------------|-------------|-------------|
| Anril        | 1261  | 1651  | 214  | 253   | 40 | 11.52450115 | 0.003206358 | 0.059716996 |
| XLOC_004803  | 841   | 1121  | 6796 | 6824  | 29 | 11.4671199  | 0.003343382 | 0.059716996 |
| XIST         | 16121 | 16501 | 5754 | 5792  | 39 | 11.44374046 | 0.003425596 | 0.059716996 |
| XLOC_008174  | 1471  | 1671  | 7897 | 7917  | 21 | 11.43951251 | 0.003425596 | 0.059716996 |
| MALAT1       | 7801  | 8231  | 2381 | 2424  | 44 | 11.3613475  | 0.00356262  | 0.059716996 |
| ANCR         | 201   | 481   | 21   | 49    | 29 | 11.34906164 | 0.00356262  | 0.059716996 |
| NEAT1        | 2371  | 2651  | 2884 | 2912  | 29 | 11.3422696  | 0.003590025 | 0.059716996 |
| XLOC_008174  | 171   | 361   | 7767 | 7786  | 20 | 11.19859052 | 0.003891477 | 0.063190176 |
| XLOC_012599  | 1721  | 2011  | 9374 | 9403  | 30 | 11.02510137 | 0.004220334 | 0.065821488 |
| lincMKLN1_A1 | 2431  | 2871  | 9757 | 9801  | 45 | 11.00709705 | 0.004247739 | 0.065821488 |
| FIRRE(MM)    | 4501  | 4691  | 1497 | 1516  | 20 | 10.96566859 | 0.004412168 | 0.065821488 |
| FIRRE(HG)    | 21    | 351   | 755  | 788   | 34 | 10.95680657 | 0.004439572 | 0.065821488 |
| XIST         | 12761 | 13101 | 5418 | 5452  | 35 | 10.76196645 | 0.005015073 | 0.069526994 |
| XIST         | 6921  | 7171  | 4834 | 4859  | 26 | 10.69724963 | 0.005097287 | 0.069526994 |
| XLOC_009233  | 231   | 591   | 8063 | 8099  | 37 | 10.68621286 | 0.005097287 | 0.069526994 |
| MALAT1       | 6851  | 7241  | 2286 | 2325  | 40 | 10.67982146 | 0.005097287 | 0.069526994 |
| XLOC_004803  | 1371  | 1651  | 6849 | 6877  | 29 | 10.36394416 | 0.006001644 | 0.079235291 |
| XLOC_009702  | 721   | 901   | 8181 | 8199  | 19 | 10.26805505 | 0.006467525 | 0.079235291 |
| XLOC_010017  | 331   | 571   | 8333 | 8357  | 25 | 10.24913754 | 0.006467525 | 0.079235291 |
| XIST         | 6051  | 6211  | 4747 | 4763  | 17 | 10.2314455  | 0.006522335 | 0.079235291 |
| XLOC_002746  | 2311  | 2631  | 6474 | 6506  | 33 | 10.18266181 | 0.006604549 | 0.079235291 |
| NEAT1        | 491   | 621   | 2696 | 2709  | 14 | 10.15253406 | 0.006741573 | 0.079235291 |
| MALAT1       | 7431  | 7581  | 2344 | 2359  | 16 | 10.07693976 | 0.007015621 | 0.079235291 |
| XLOC_008174  | 541   | 701   | 7804 | 7820  | 17 | 10.01526494 | 0.007289668 | 0.079235291 |
| XLOC_010017  | 1531  | 1781  | 8453 | 8478  | 26 | 9.98929264  | 0.007426692 | 0.079235291 |
| lincSFPQ     | 1841  | 2141  | 9994 | 10024 | 31 | 9.942391236 | 0.007508907 | 0.079235291 |
| XIST         | 2971  | 3171  | 4439 | 4459  | 21 | 9.877254967 | 0.007755549 | 0.079235291 |
| TUG1         | 1781  | 2101  | 3608 | 3640  | 33 | 9.867881366 | 0.007782954 | 0.079235291 |
| lincMKLN1_A1 | 891   | 1131  | 9603 | 9627  | 25 | 9.831878803 | 0.007919978 | 0.079235291 |
| NEAT1        | 331   | 451   | 2680 | 2692  | 13 | 9.81284518  | 0.008057002 | 0.079235291 |
| BORG         | 1111  | 1431  | 368  | 400   | 33 | 9.782576326 | 0.008194026 | 0.079235291 |
| MALAT1       | 2521  | 2901  | 1853 | 1891  | 39 | 9.77752032  | 0.008221431 | 0.079235291 |
| TUG1         | 1361  | 1681  | 3566 | 3598  | 33 | 9.767173639 | 0.008221431 | 0.079235291 |
| XLOC_006922  | 1631  | 1841  | 7720 | 7741  | 22 | 9.763916247 | 0.008221431 | 0.079235291 |
| NR_024412    | 681   | 961   | 3090 | 3118  | 29 | 9.749488125 | 0.008221431 | 0.079235291 |
| XIST         | 381   | 621   | 4180 | 4204  | 25 | 9.740872842 | 0.008248835 | 0.079235291 |
| lincMKLN1_A1 | 71    | 361   | 9521 | 9550  | 30 | 9.718595048 | 0.008248835 | 0.079235291 |
| XLOC_006922  | 191   | 301   | 7576 | 7587  | 12 | 9.61563693  | 0.008659907 | 0.082028562 |



|              |       |       |      |      |    |             |             |             |
|--------------|-------|-------|------|------|----|-------------|-------------|-------------|
| GAS5         | 191   | 581   | 1555 | 1594 | 40 | 9.556464433 | 0.008988764 | 0.083012959 |
| XLOC_005764  | 2481  | 2681  | 7510 | 7530 | 21 | 9.541211311 | 0.009098383 | 0.083012959 |
| lincMKLN1_A1 | 1561  | 1851  | 9670 | 9699 | 30 | 9.508742545 | 0.009262812 | 0.083012959 |
| XLOC_005151  | 1741  | 1931  | 7130 | 7149 | 20 | 9.499559434 | 0.009317621 | 0.083012959 |
| NR_024412    | 1     | 321   | 3022 | 3054 | 33 | 9.487733444 | 0.009372431 | 0.083012959 |
| lincSFPQ     | 1391  | 1531  | 9949 | 9963 | 15 | 9.402578042 | 0.009920526 | 0.086741011 |
| TUG1         | 5531  | 5911  | 3983 | 4021 | 39 | 9.388324727 | 0.010084955 | 0.087062521 |
| TUG1         | 2381  | 2491  | 3668 | 3679 | 12 | 9.335727122 | 0.010386407 | 0.087450984 |
| XLOC_008174  | 2351  | 2661  | 7985 | 8016 | 32 | 9.335169811 | 0.010386407 | 0.087450984 |
| Meg3         | 1091  | 1191  | 2582 | 2592 | 11 | 9.278524991 | 0.01063305  | 0.088435856 |
| Anril        | 81    | 231   | 96   | 111  | 16 | 9.228506729 | 0.010907098 | 0.089622177 |
| XLOC_008174  | 751   | 821   | 7825 | 7832 | 8  | 9.159841288 | 0.01126336  | 0.090227838 |
| NR_029435    | 2051  | 2331  | 3341 | 3369 | 29 | 9.134362622 | 0.011345574 | 0.090227838 |
| XIST         | 9151  | 9431  | 5057 | 5085 | 29 | 9.117188944 | 0.011482598 | 0.090227838 |
| XIST         | 9811  | 9921  | 5123 | 5134 | 12 | 9.113299648 | 0.011510003 | 0.090227838 |
| MALAT1       | 3961  | 4401  | 1997 | 2041 | 45 | 9.076917904 | 0.011756646 | 0.091114004 |
| NEAT1        | 2861  | 3121  | 2933 | 2959 | 27 | 9.046833402 | 0.011948479 | 0.091396408 |
| XLOC_011185  | 891   | 1091  | 8807 | 8827 | 21 | 9.023369996 | 0.012167717 | 0.091396408 |
| lincMKLN1_A1 | 521   | 651   | 9566 | 9579 | 14 | 9.020322347 | 0.012195122 | 0.091396408 |
| XIST         | 4491  | 4631  | 4591 | 4605 | 15 | 8.826916519 | 0.013400932 | 0.095955113 |
| XIST         | 16641 | 16871 | 5806 | 5829 | 24 | 8.817645092 | 0.013537956 | 0.095955113 |
| lincMKLN1_A1 | 671   | 811   | 9581 | 9595 | 15 | 8.81763317  | 0.013537956 | 0.095955113 |
| XLOC_010017  | 1111  | 1311  | 8411 | 8431 | 21 | 8.815631478 | 0.01356536  | 0.095955113 |
| XLOC_008174  | 441   | 521   | 7794 | 7802 | 9  | 8.804086668 | 0.01356536  | 0.095955113 |
| GAS5         | 21    | 171   | 1538 | 1553 | 16 | 8.78673623  | 0.013647575 | 0.095955113 |
| Meg3         | 1341  | 1471  | 2607 | 2620 | 14 | 8.749308529 | 0.013866813 | 0.096093298 |
| MALAT1       | 971   | 1171  | 1698 | 1718 | 21 | 8.733773256 | 0.013949027 | 0.096093298 |
| XIST         | 15351 | 15591 | 5677 | 5701 | 25 | 8.680936005 | 0.014223075 | 0.096565269 |
| FIRRE(MM)    | 3011  | 3381  | 1348 | 1385 | 38 | 8.665956832 | 0.014332694 | 0.096565269 |
| MALAT1       | 7611  | 7751  | 2362 | 2376 | 15 | 8.648774192 | 0.014469718 | 0.096565269 |
| Meg3         | 731   | 871   | 2546 | 2560 | 15 | 8.62001438  | 0.014688956 | 0.096565269 |
| NR_029435    | 601   | 841   | 3196 | 3220 | 25 | 8.577164138 | 0.015045218 | 0.096565269 |
| XLOC_002746  | 2101  | 2251  | 6453 | 6468 | 16 | 8.565846696 | 0.015127432 | 0.096565269 |
| NR_029435    | 111   | 241   | 3147 | 3160 | 14 | 8.539550461 | 0.015209646 | 0.096565269 |
| XLOC_010514  | 631   | 791   | 8585 | 8601 | 17 | 8.532789269 | 0.015209646 | 0.096565269 |
| XLOC_002408  | 631   | 951   | 6199 | 6231 | 33 | 8.518004657 | 0.015291861 | 0.096565269 |
| XLOC_002746  | 521   | 791   | 6295 | 6322 | 28 | 8.473451979 | 0.015620718 | 0.09773697  |
